# Supplementary material for: A convenient three-component reaction leading to the synthesis of polysubstituted cyclohexene derivatives
Source: Royal Society of Chemistry journal article supplement (doi:10.1039/b810299f), 2008-01-01
Supplement: b810299f.pdf [file b810299f.pdf]

## Supporting Information

### A Convenient Three-Component Reaction Leading to the Synthesis of Polysubstituted Cyclohexene Derivatives

Xiao-Yang Guan and Min Shi\*

*State Key Laboratory of Organometallic Chemistry,  
Shanghai Institute of Organic Chemistry, Chinese Academy of Sciences,  
Shanghai 200032, China. [mshi@mail.sioc.ac.cn](mailto:mshi@mail.sioc.ac.cn). Fax: 86-21-64166128*

***RECEIVED DATE (to be automatically inserted after your manuscript is accepted if required according to the journal that you are submitting your paper to)***

#### ***Content***

|                                                     |     |
|-----------------------------------------------------|-----|
| Mechanistic investigation by cross over experiments | S2  |
| Spectroscopic data                                  | S5  |
| X-ray data of <b>4a-1</b> and <b>4a-2</b>           | S20 |

### Mechanistic investigation by cross-over experiments

Under these optimized reaction conditions, we also examined the three-component reaction in which the substituents on the benzene rings of nitroalkene **1** and arylmethylidenemalononitrile **2** are different. Unfortunately, complex product mixtures were formed on the basis of  $^1\text{H}$  NMR spectroscopic investigation under identical conditions. The three-component reaction of nitroalkene **1d**, arylmethylidenemalononitrile **2a** and malononitrile **3** was conducted to give the mixture of compounds **4a**, **7a** (or **7b**) and **4d**. Also we could get compounds **7a** (or **7b**) and **4d** from the reaction of **1a**, **2d** and **3** (Scheme 1).

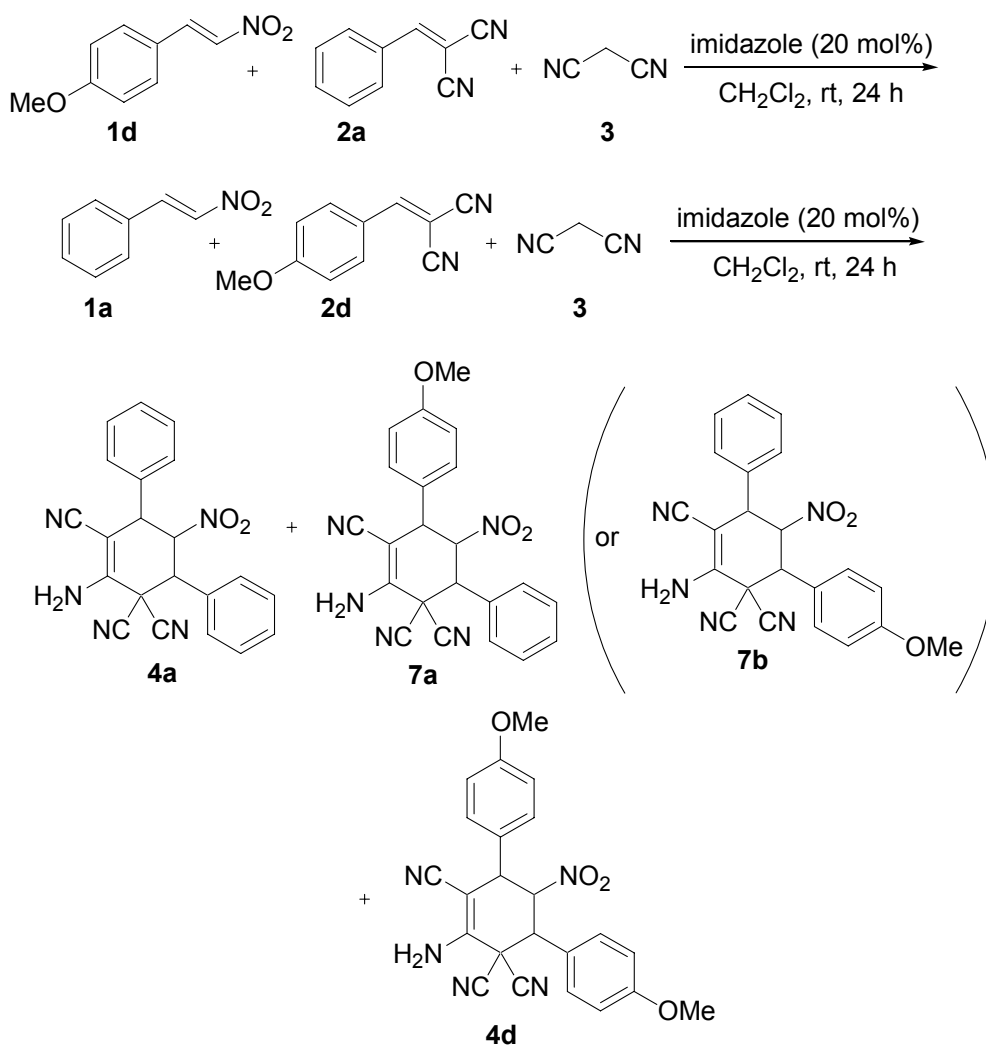

**Scheme 1** The three-component reaction in which the substitution groups on the benzene rings of nitroalkene and arylidenemalononitrile were different.

According to our understanding of the mechanism, the aromatic group exchange is due to 1,5-H shift in intermediate **C** and subsequent retro-Michael addition (Scheme 2). The anionic intermediates **B** and **F** could undergo nucleophilic attack to either arylmethylidenemalononitrile **E** or **G** to give different products.

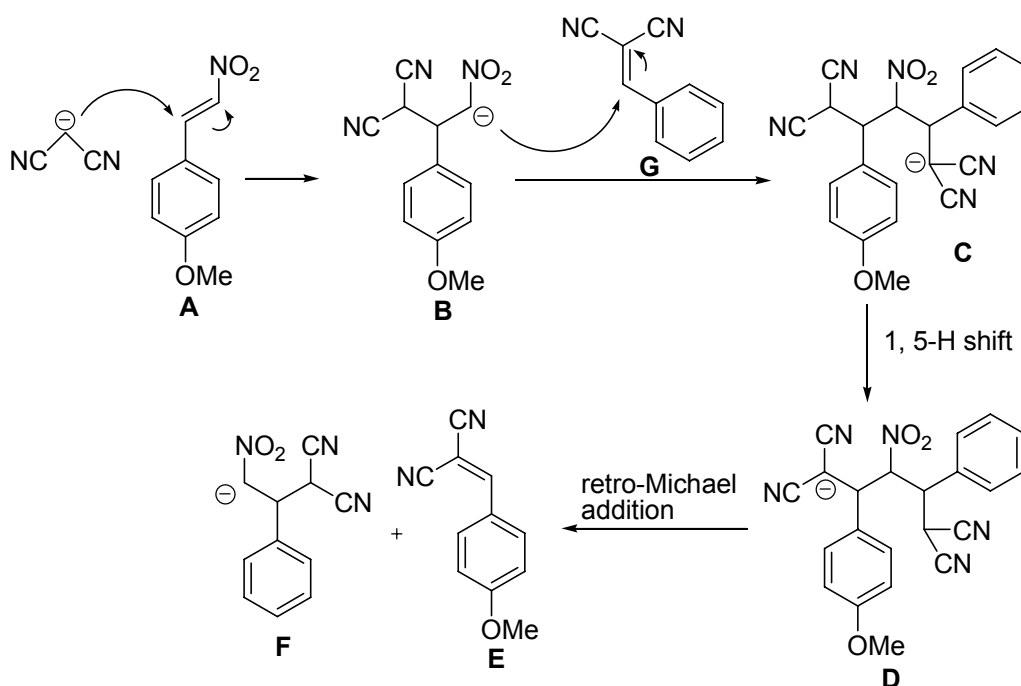

**Scheme 2** The mechanism of the aromatic group exchange process

To investigate the reaction mechanism, some other cross-over experiments were conducted. For example, we carried out the reaction of nitroalkene **1a**, arylmethylidenemalononitrile **2'** and malononitrile **3** under the standard conditions. To our surprise, we only obtained product **4a** in 26 % yield, which did not contain CO<sub>2</sub>Et group (Scheme 3, eq 1). The similar result was also obtained in the reaction of **1a**, **2a** and cyanoacetic acid ethyl ester **3'** (Scheme 3, eq 2). However, the reaction did not take place in the absence of both arylmethylidenemalononitrile and malononitrile (Scheme 3, eq 3).

Through the results shown in Schemes 1 and 3, we could conclude that the malononitrile or its derivative arylmethylidenemalononitrile is very important in this three-component

reaction. The aromatic groups between nitroalkene **1** and arylmethylidenemalononitrile **2** exchange processes exist during the reaction. Moreover, malononitrile also can exchange between arylmethylidenemalononitrile **2** and **3** during the reaction.

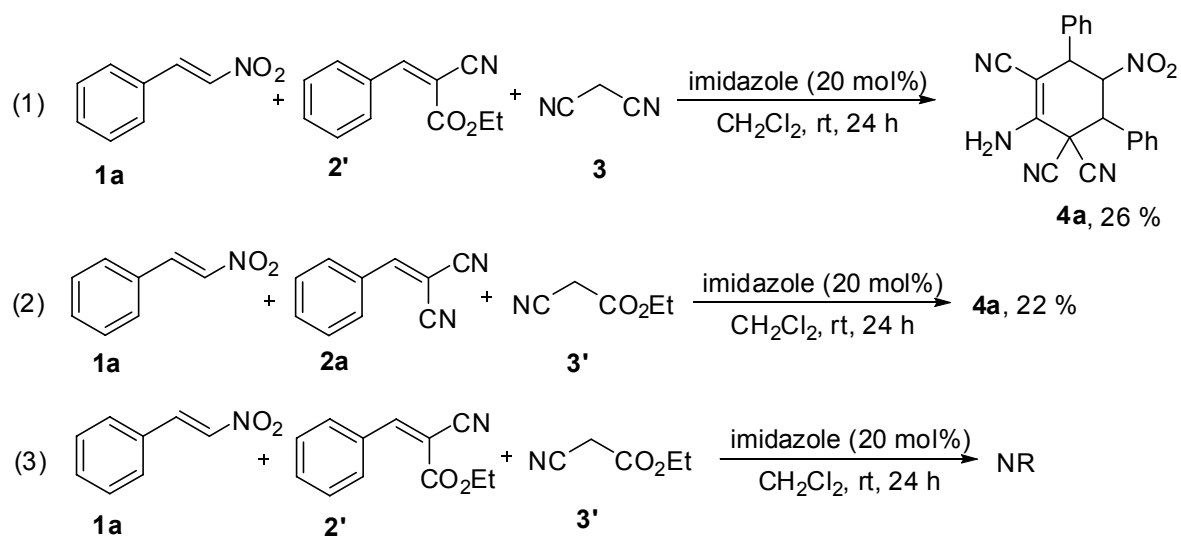

**Scheme 3** Some other cross-over experiments

## Spectroscopic data of the reaction products

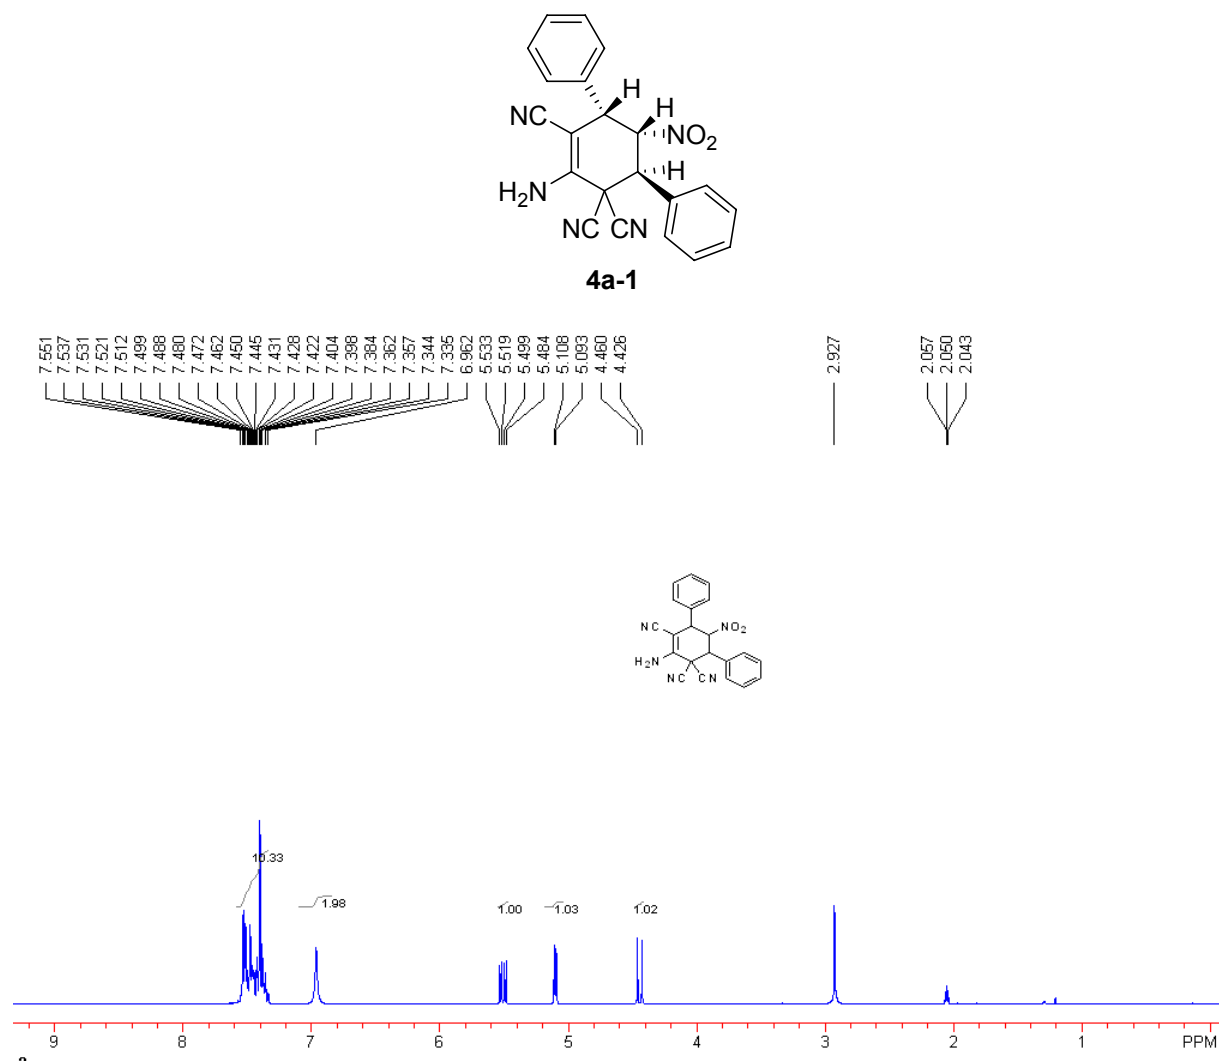

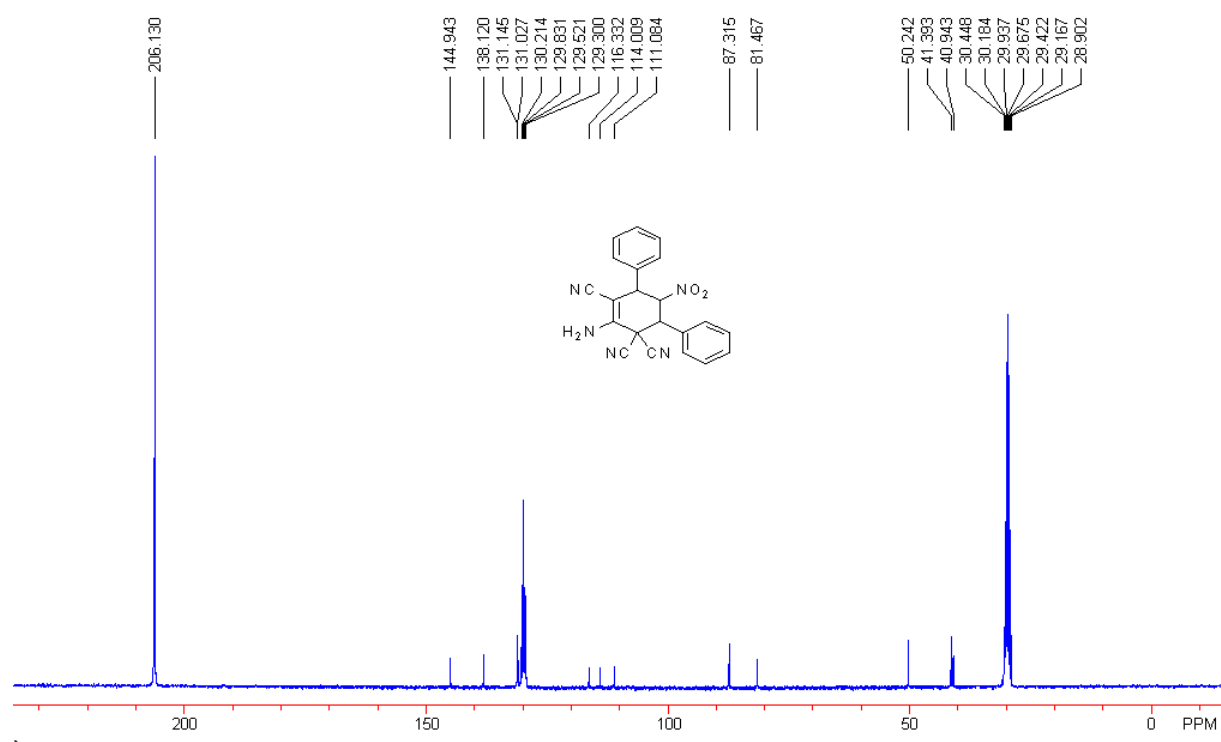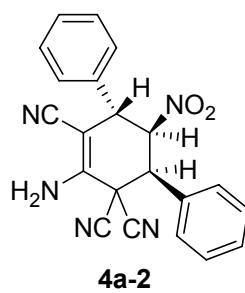

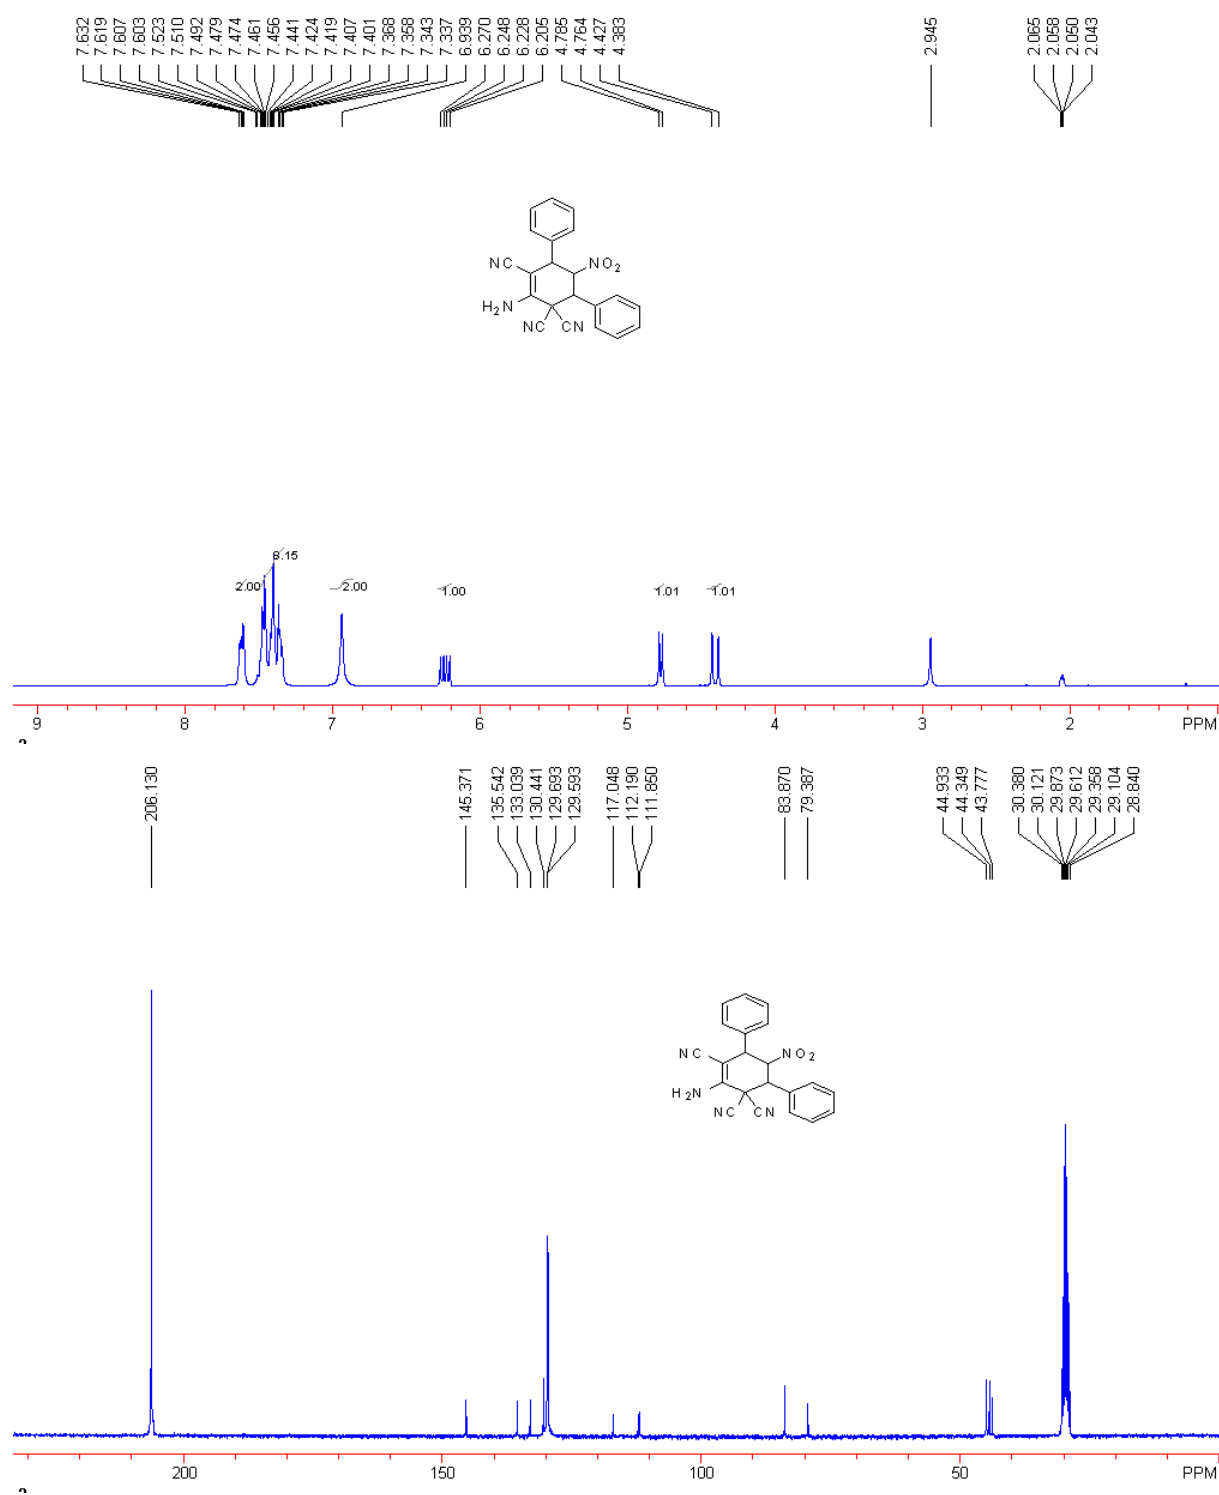

A mixture of compounds **4a-1**, **4a-2** and **4a-3** for the determination of the product distribution.

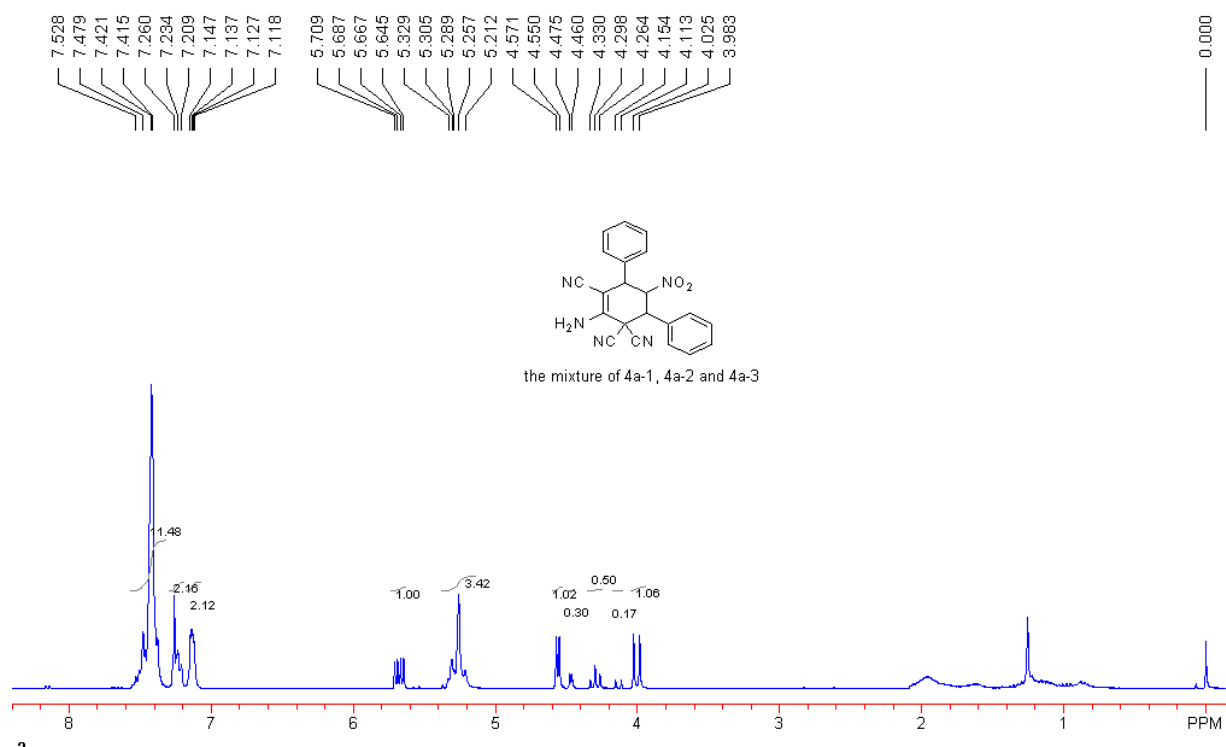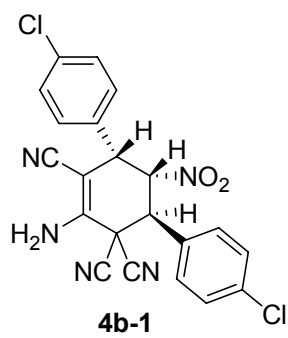



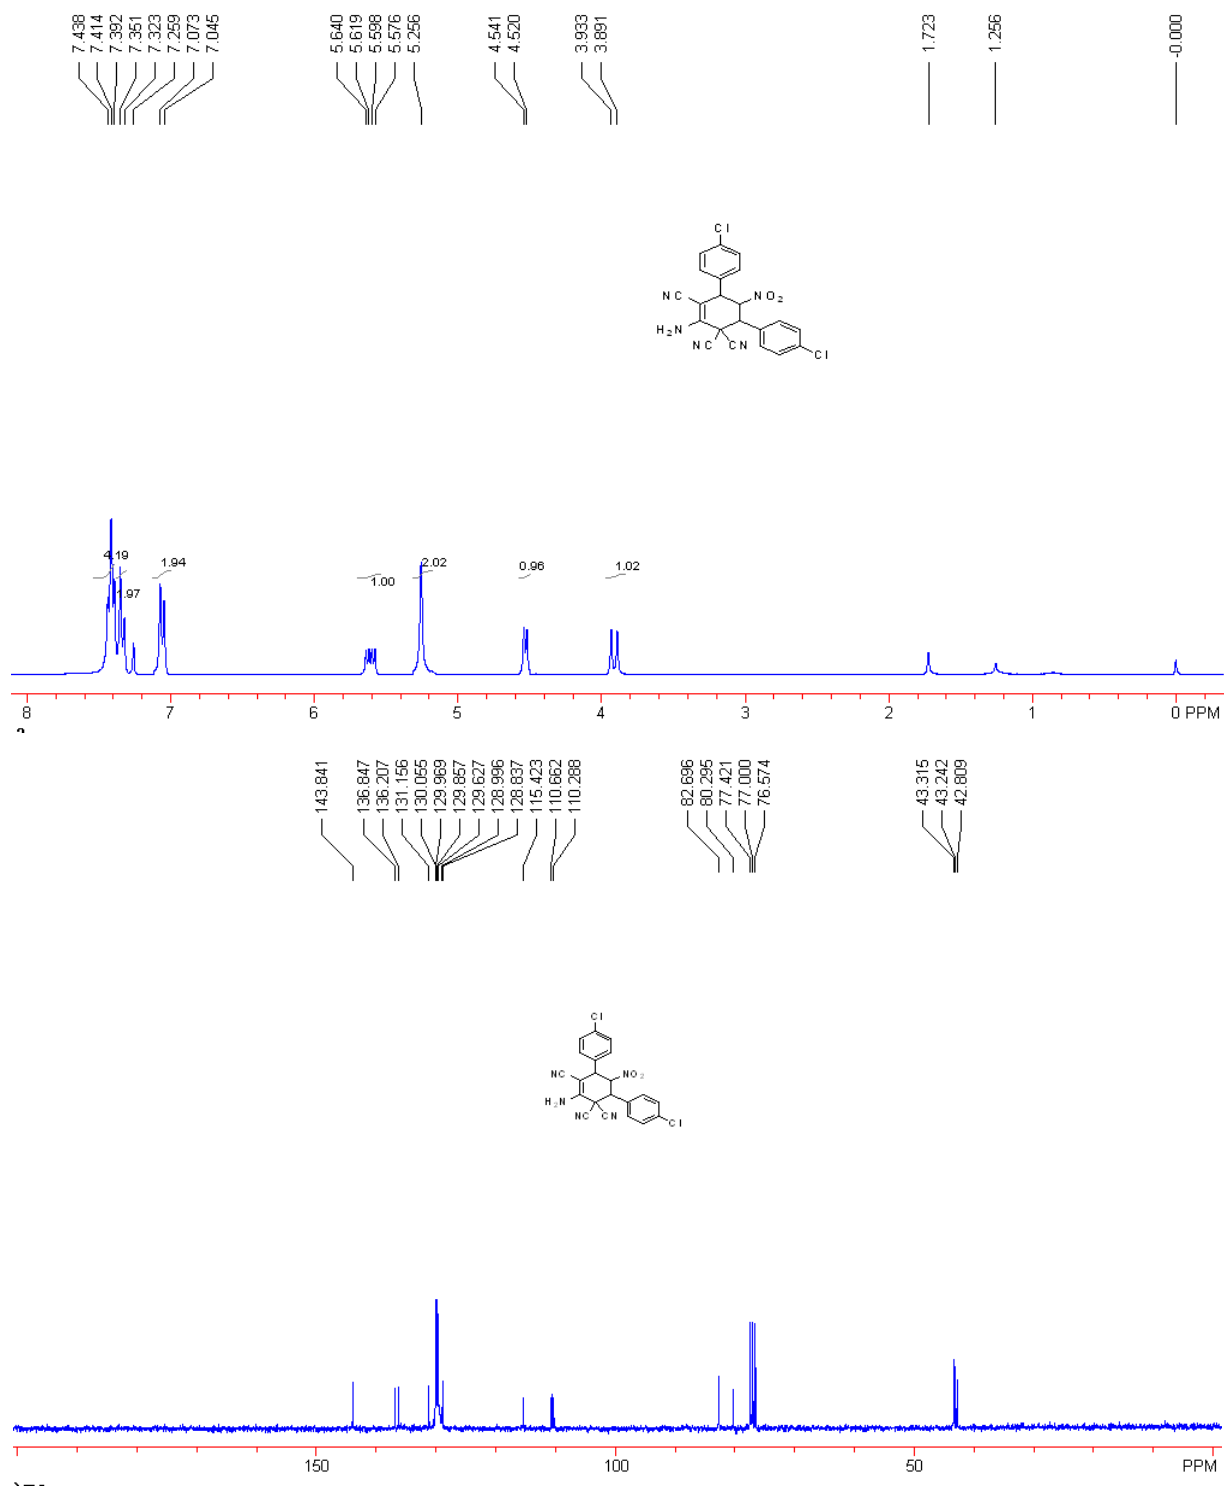

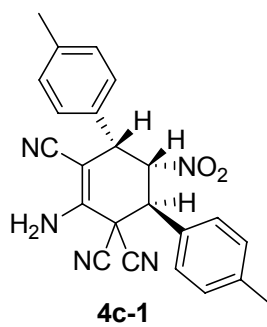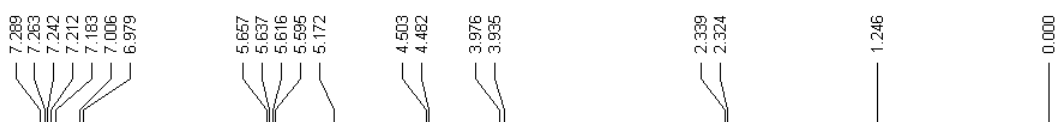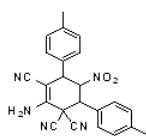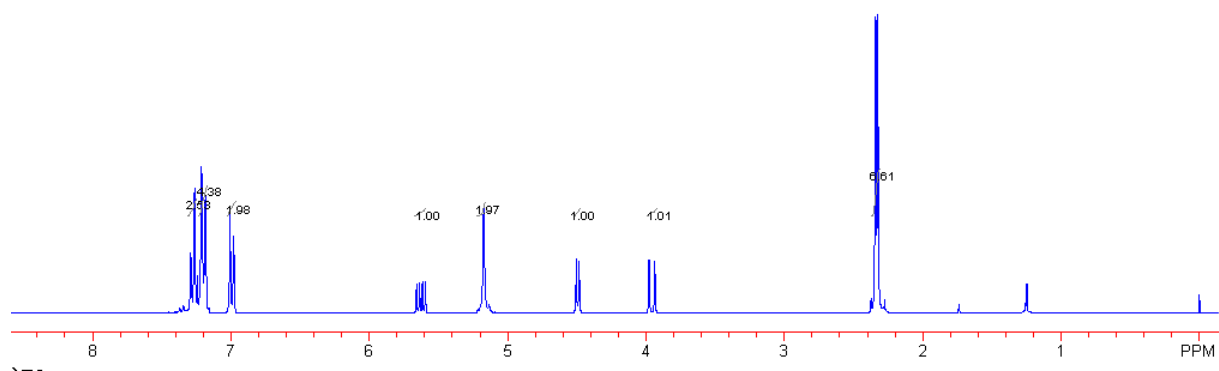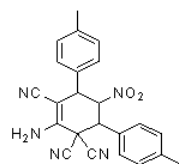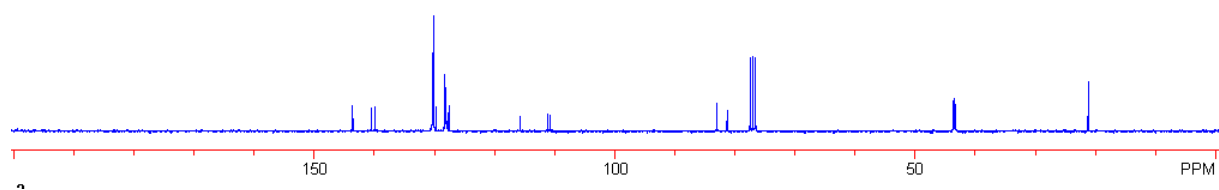

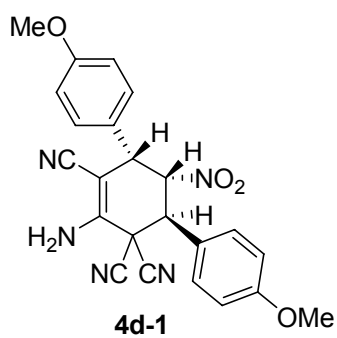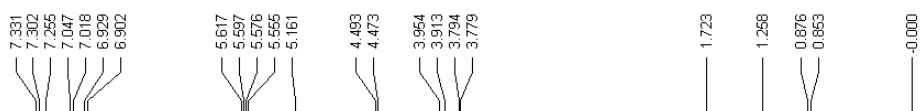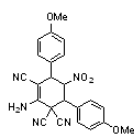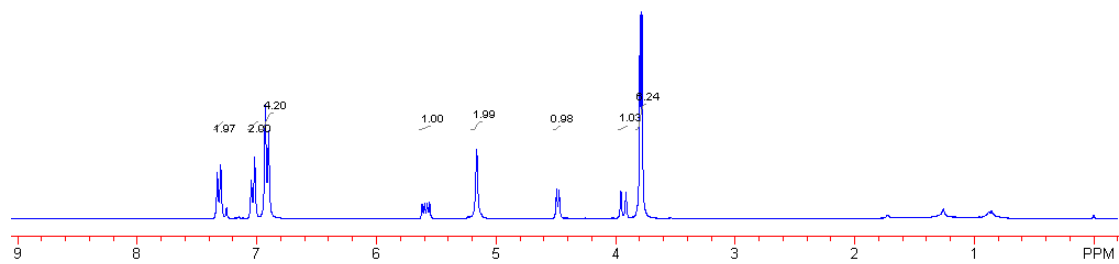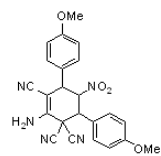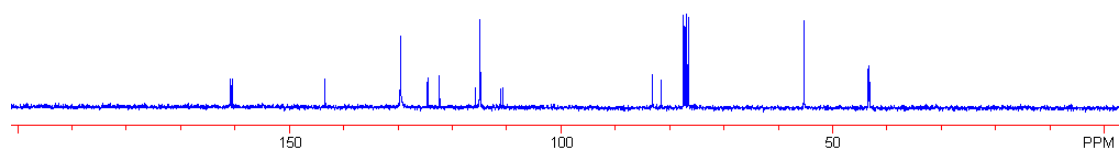

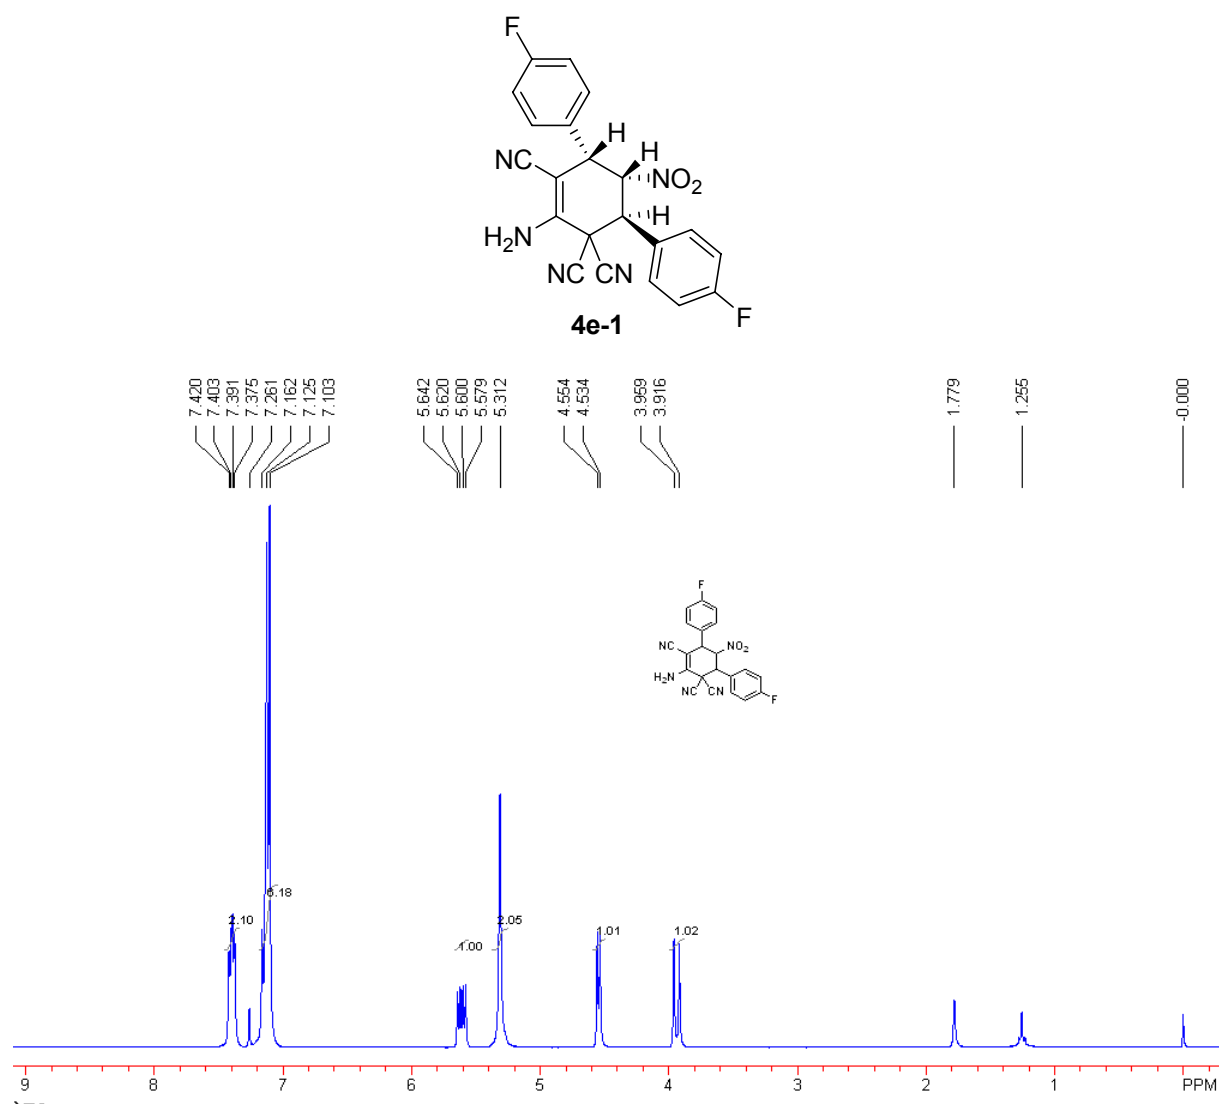

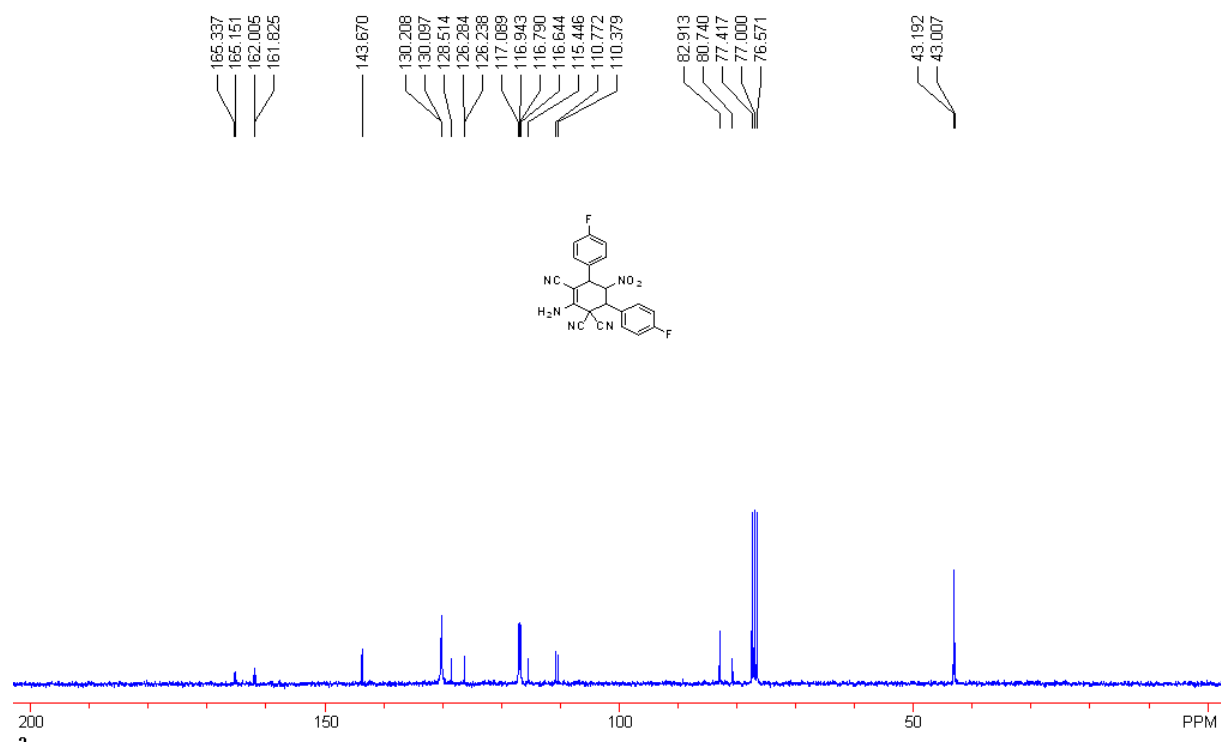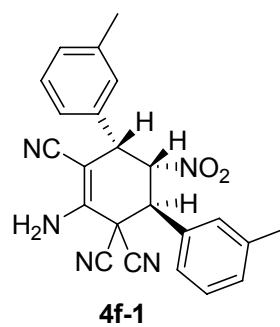

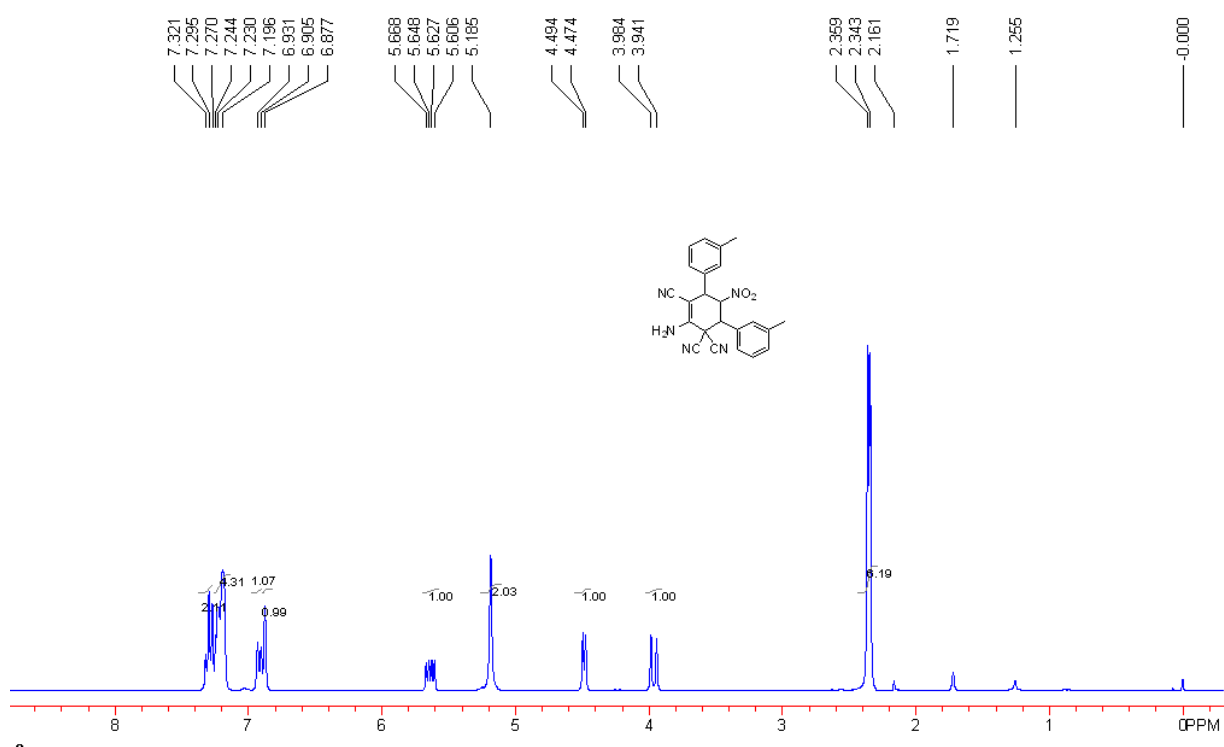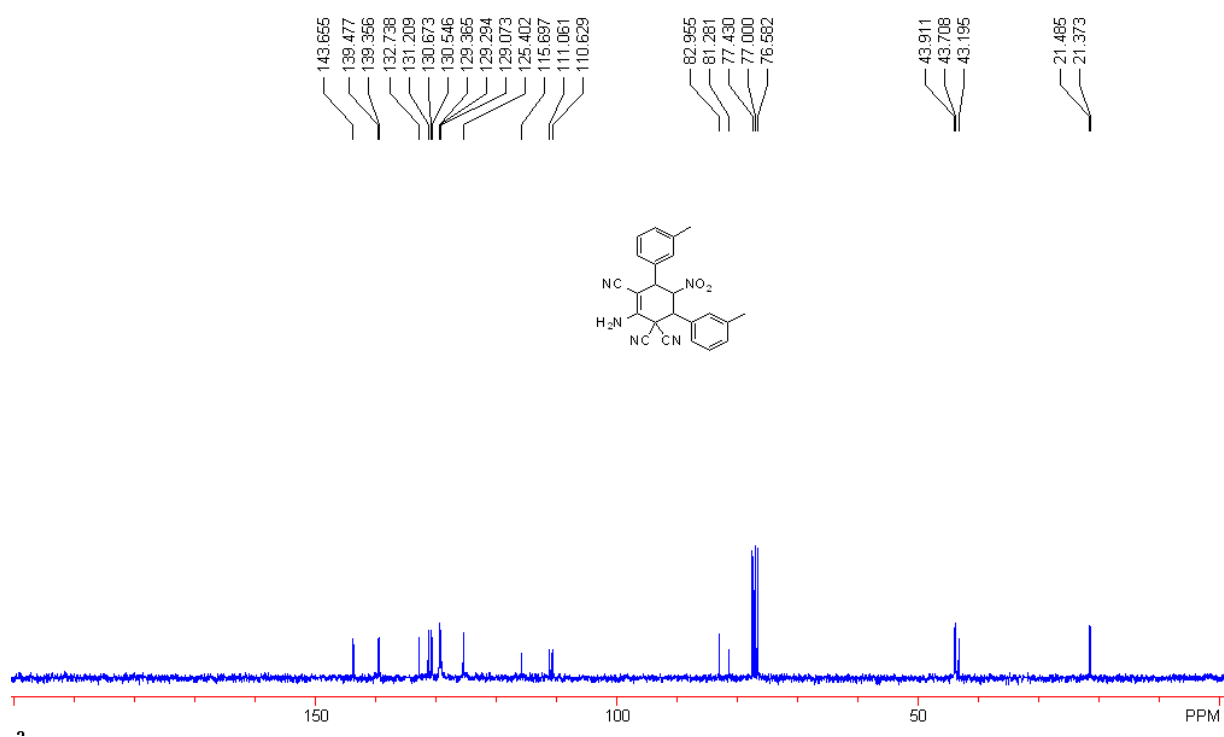

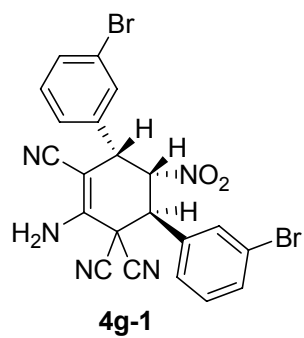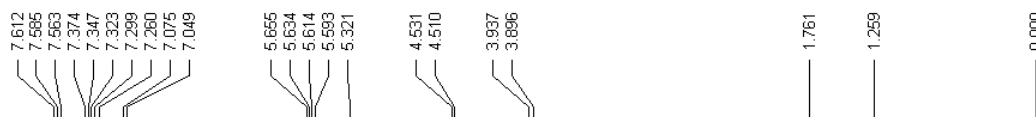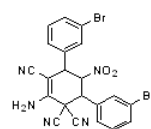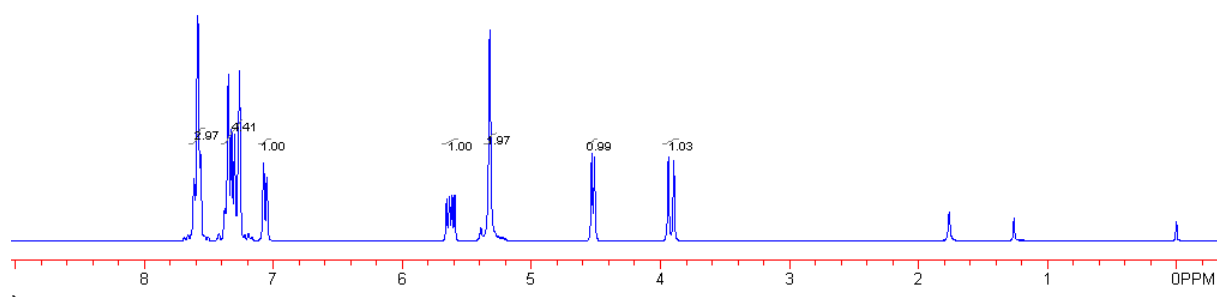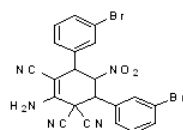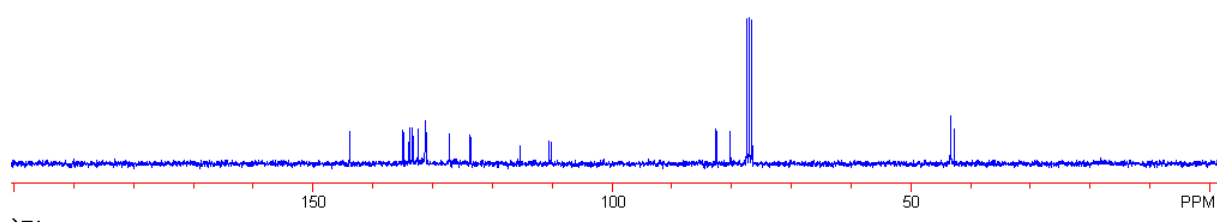

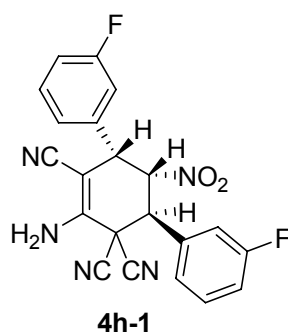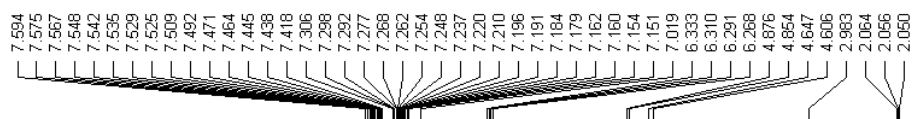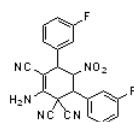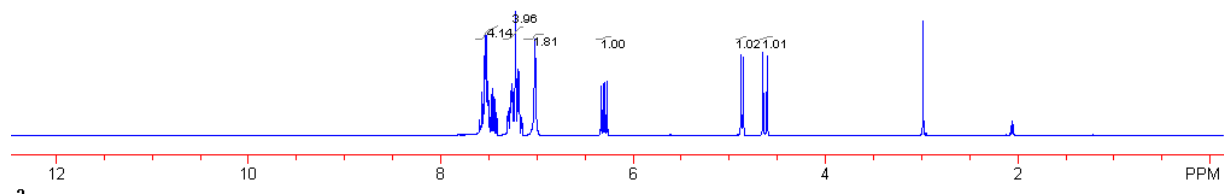



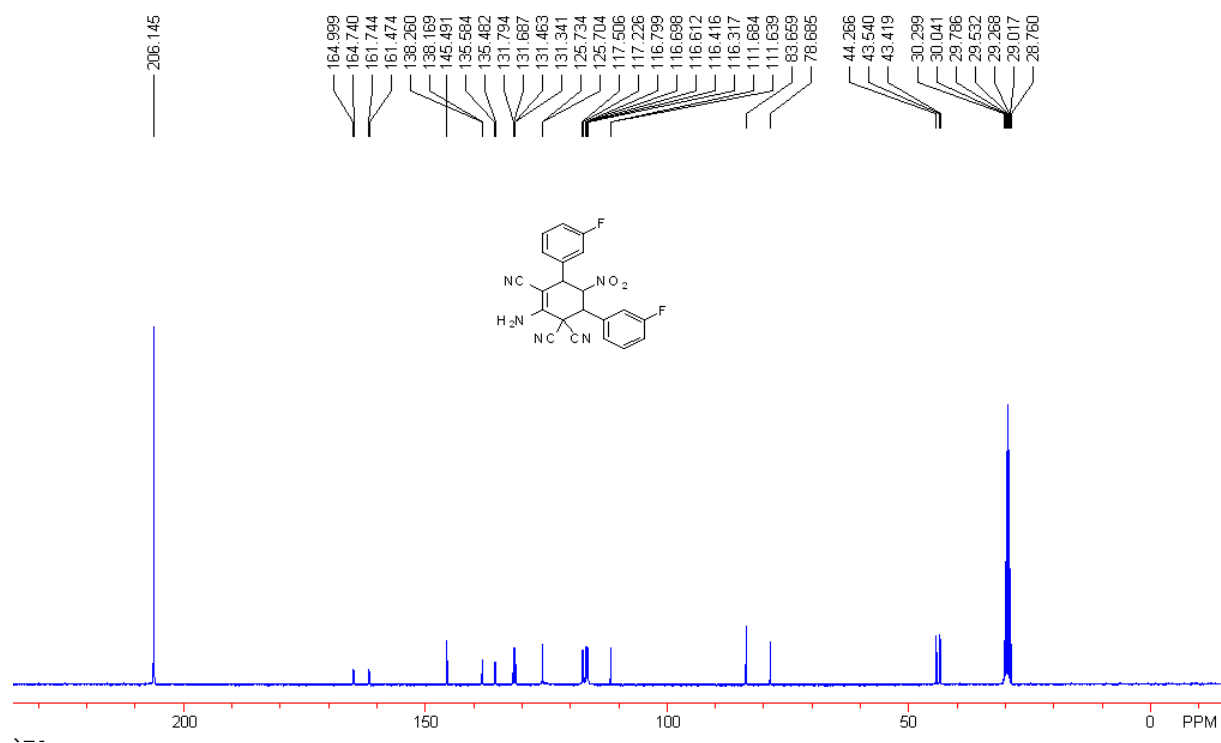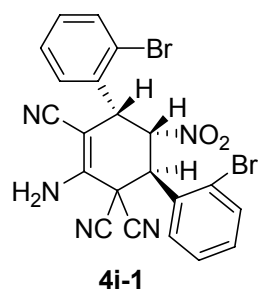

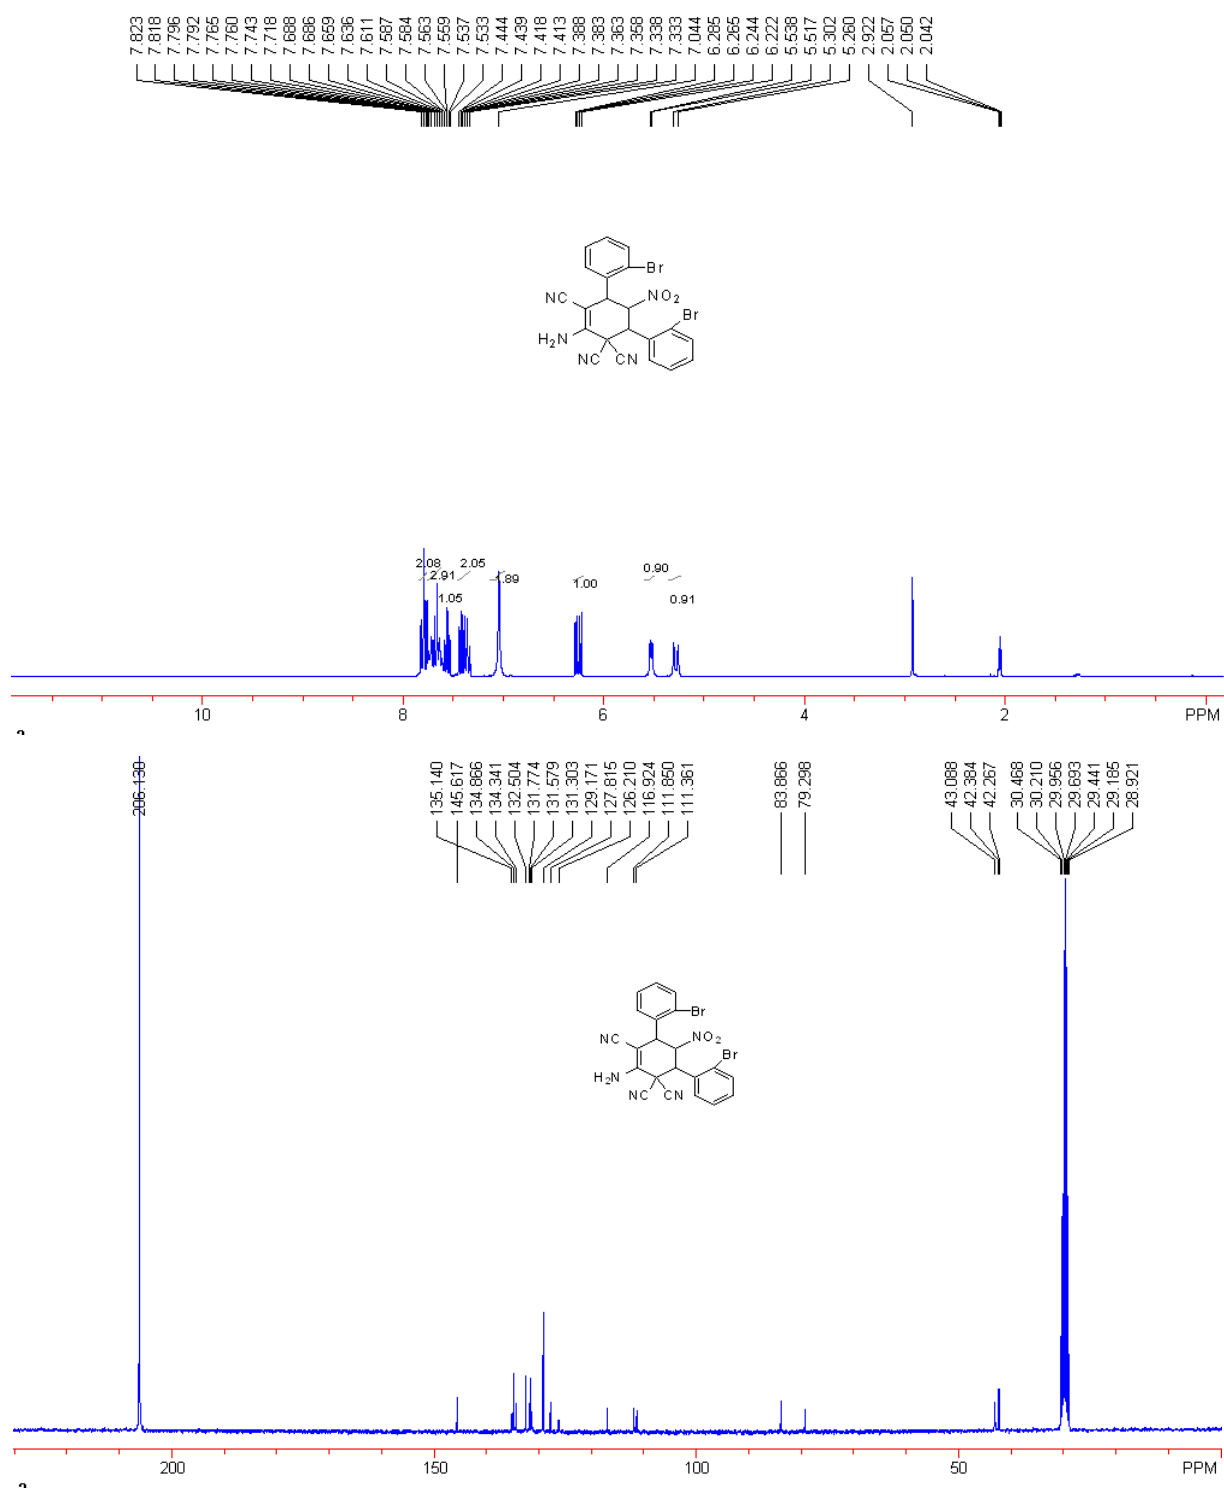

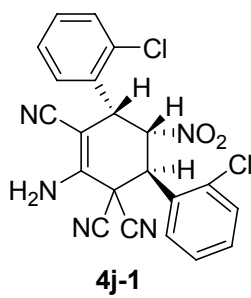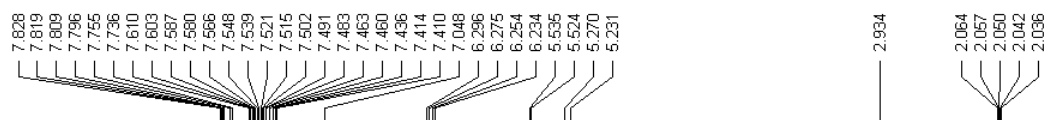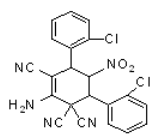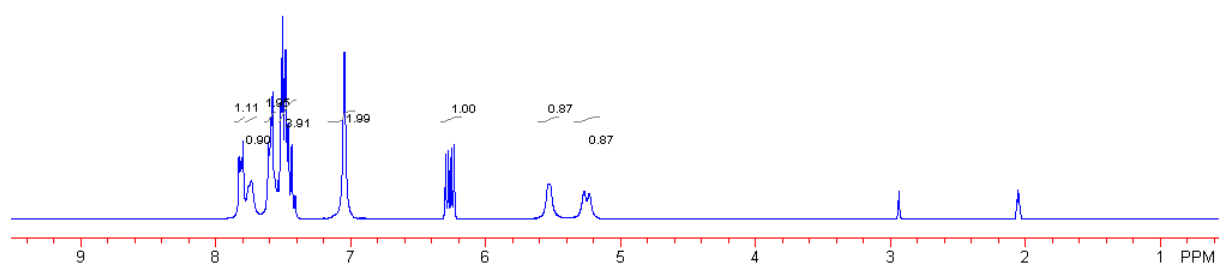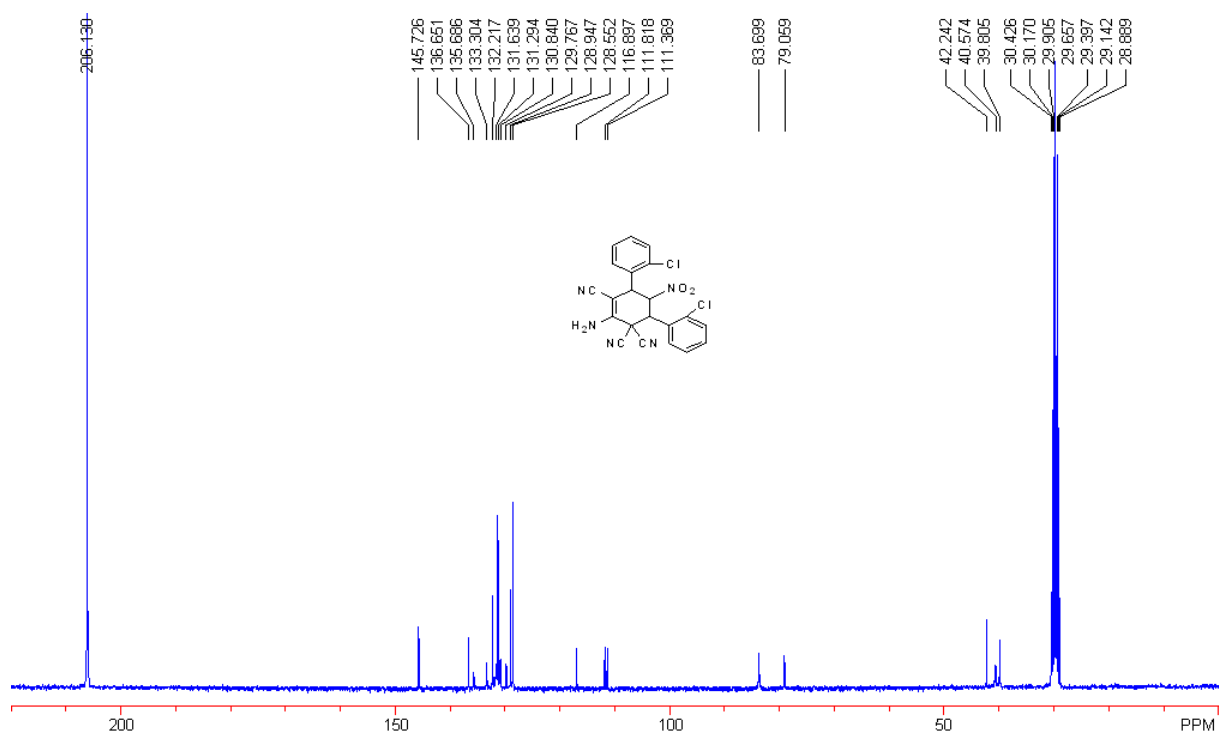

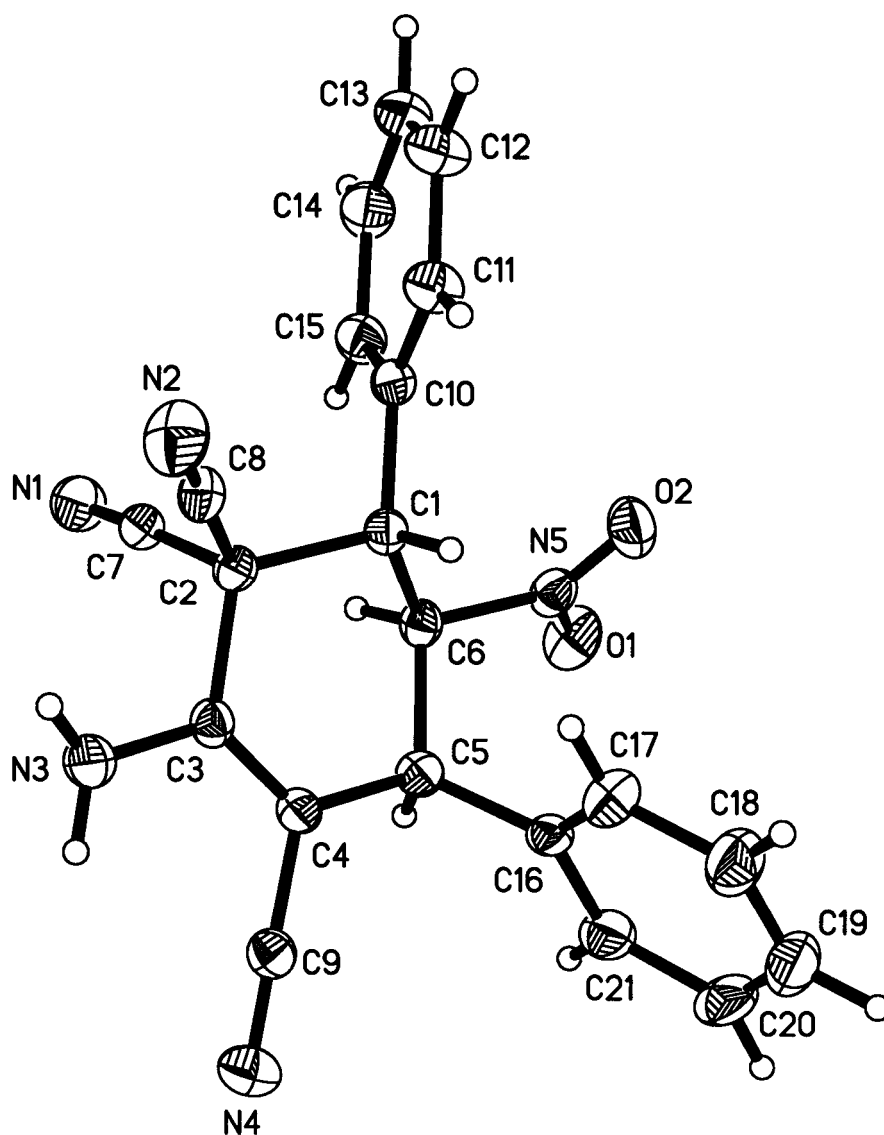

The crystal data of compound **4a-1** have been deposited in CCDC with number 688760. Empirical Formula:  $C_{21}H_{16}N_5O_{2.33}$ ; Formula Weight: 375.72; Crystal size: 0.469 x 0.411 x 0.347; Crystal Color, Habit: colorless, prismatic; Crystal System: Rhombohedral; Lattice Type: Primitive; Lattice Parameters:  $a = 23.2536(10)\text{\AA}$ ,  $b = 23.2536(10)\text{\AA}$ ,  $c = 17.7700(11)\text{\AA}$ ,  $\alpha = 90^\circ$ ,  $\beta = 90^\circ$ ,  $\gamma = 120^\circ$ ,  $V = 8321.4(7)\text{\AA}^3$ ; Space group: R-3;  $Z = 18$ ;  $D_{calc} = 1.350\text{ g/cm}^3$ ;  $F_{000} = 3522$ ;  $R1 = 0.0514$ ,  $wR2 = 0.1330$ . Diffractometer: Rigaku AFC7R.

Table 1. Crystal data and structure refinement for cd28234.

|                                   |                                                                                                                      |
|-----------------------------------|----------------------------------------------------------------------------------------------------------------------|
| Identification code               | cd28234                                                                                                              |
| Empirical formula                 | C21 H16 N5 O2.33                                                                                                     |
| Formula weight                    | 375.72                                                                                                               |
| Temperature                       | 293(2) K                                                                                                             |
| Wavelength                        | 0.71073 Å                                                                                                            |
| Crystal system, space group       | Rhombohedral, R-3                                                                                                    |
| Unit cell dimensions              | a = 23.2536(10) Å    alpha = 90 deg.<br>b = 23.2536(10) Å    beta = 90 deg.<br>c = 17.7700(11) Å    gamma = 120 deg. |
| Volume                            | 8321.4(7) Å <sup>3</sup>                                                                                             |
| Z, Calculated density             | 18, 1.350 Mg/m <sup>3</sup>                                                                                          |
| Absorption coefficient            | 0.092 mm <sup>-1</sup>                                                                                               |
| F(000)                            | 3522                                                                                                                 |
| Crystal size                      | 0.469 x 0.411 x 0.347 mm                                                                                             |
| Theta range for data collection   | 1.53 to 27.00 deg.                                                                                                   |
| Limiting indices                  | -28<=h<=29, -25<=k<=29, -19<=l<=22                                                                                   |
| Reflections collected / unique    | 16528 / 4041 [R(int) = 0.0765]                                                                                       |
| Completeness to theta = 27.00     | 100.0 %                                                                                                              |
| Absorption correction             | Empirical                                                                                                            |
| Max. and min. transmission        | 1.00000 and 0.75474                                                                                                  |
| Refinement method                 | Full-matrix least-squares on F <sup>2</sup>                                                                          |
| Data / restraints / parameters    | 4041 / 3 / 267                                                                                                       |
| Goodness-of-fit on F <sup>2</sup> | 1.020                                                                                                                |
| Final R indices [I>2sigma(I)]     | R1 = 0.0514, wR2 = 0.1330                                                                                            |
| R indices (all data)              | R1 = 0.0744, wR2 = 0.1418                                                                                            |
| Largest diff. peak and hole       | 0.735 and -0.309 e.Å <sup>-3</sup>                                                                                   |

Table 2. Atomic coordinates ( $\times 10^4$ ) and equivalent isotropic displacement parameters ( $\text{\AA}^2 \times 10^3$ ) for cd28234. U(eq) is defined as one third of the trace of the orthogonalized  $U_{ij}$  tensor.

|       | x       | y       | z        | U(eq)  |
|-------|---------|---------|----------|--------|
| N(1)  | -201(1) | 2526(1) | 1388(1)  | 56(1)  |
| N(2)  | -675(1) | 2670(1) | -966(1)  | 65(1)  |
| N(3)  | -733(1) | 3637(1) | 462(1)   | 55(1)  |
| N(4)  | 119(1)  | 5301(1) | 1062(1)  | 55(1)  |
| N(5)  | 1975(1) | 4296(1) | 430(1)   | 44(1)  |
| O(1)  | 2348(1) | 4571(1) | 956(1)   | 64(1)  |
| O(2)  | 2153(1) | 4239(1) | -192(1)  | 62(1)  |
| C(1)  | 814(1)  | 3547(1) | -28(1)   | 35(1)  |
| C(2)  | 68(1)   | 3281(1) | 202(1)   | 34(1)  |
| C(3)  | -79(1)  | 3826(1) | 432(1)   | 35(1)  |
| C(4)  | 416(1)  | 4420(1) | 649(1)   | 35(1)  |
| C(5)  | 1146(1) | 4634(1) | 697(1)   | 37(1)  |
| C(6)  | 1243(1) | 4030(1) | 584(1)   | 36(1)  |
| C(7)  | -104(1) | 2829(1) | 855(1)   | 38(1)  |
| C(8)  | -354(1) | 2919(1) | -453(1)  | 40(1)  |
| C(9)  | 250(1)  | 4909(1) | 879(1)   | 40(1)  |
| C(10) | 929(1)  | 2963(1) | -172(1)  | 38(1)  |
| C(11) | 856(1)  | 2718(1) | -893(1)  | 52(1)  |
| C(12) | 935(1)  | 2177(1) | -1049(2) | 66(1)  |
| C(13) | 1096(1) | 1884(1) | -485(2)  | 65(1)  |
| C(14) | 1180(1) | 2126(1) | 231(1)   | 61(1)  |
| C(15) | 1093(1) | 2662(1) | 398(1)   | 48(1)  |
| C(16) | 1552(1) | 5233(1) | 191(1)   | 40(1)  |
| C(17) | 1493(1) | 5206(1) | -583(1)  | 56(1)  |
| C(18) | 1856(1) | 5762(1) | -1014(2) | 71(1)  |
| C(19) | 2269(1) | 6358(1) | -699(2)  | 79(1)  |
| C(20) | 2323(1) | 6406(1) | 68(2)    | 79(1)  |
| C(21) | 1968(1) | 5842(1) | 520(1)   | 59(1)  |
| O(3)  | 10000   | 10000   | 9509(7)  | 165(7) |

Table 3. Bond lengths [Å] and angles [deg] for cd28234.

|                  |            |
|------------------|------------|
| N(1)-C(7)        | 1.133(2)   |
| N(2)-C(8)        | 1.136(2)   |
| N(3)-C(3)        | 1.356(2)   |
| N(3)-H(3A)       | 0.814(15)  |
| N(3)-H(3B)       | 0.863(16)  |
| N(4)-C(9)        | 1.142(2)   |
| N(5)-O(2)        | 1.211(2)   |
| N(5)-O(1)        | 1.215(2)   |
| N(5)-C(6)        | 1.517(2)   |
| C(1)-C(6)        | 1.523(2)   |
| C(1)-C(10)       | 1.531(2)   |
| C(1)-C(2)        | 1.576(2)   |
| C(1)-H(1)        | 0.9800     |
| C(2)-C(7)        | 1.481(2)   |
| C(2)-C(8)        | 1.483(2)   |
| C(2)-C(3)        | 1.524(2)   |
| C(3)-C(4)        | 1.339(2)   |
| C(4)-C(9)        | 1.431(2)   |
| C(4)-C(5)        | 1.513(2)   |
| C(5)-C(16)       | 1.525(2)   |
| C(5)-C(6)        | 1.544(2)   |
| C(5)-H(5)        | 0.9800     |
| C(6)-H(6)        | 0.9800     |
| C(10)-C(11)      | 1.378(3)   |
| C(10)-C(15)      | 1.388(3)   |
| C(11)-C(12)      | 1.386(3)   |
| C(11)-H(11)      | 0.9300     |
| C(12)-C(13)      | 1.367(3)   |
| C(12)-H(12)      | 0.9300     |
| C(13)-C(14)      | 1.365(3)   |
| C(13)-H(13)      | 0.9300     |
| C(14)-C(15)      | 1.391(3)   |
| C(14)-H(14)      | 0.9300     |
| C(15)-H(15)      | 0.9300     |
| C(16)-C(17)      | 1.381(3)   |
| C(16)-C(21)      | 1.382(3)   |
| C(17)-C(18)      | 1.370(3)   |
| C(17)-H(17)      | 0.9300     |
| C(18)-C(19)      | 1.353(4)   |
| C(18)-H(18)      | 0.9300     |
| C(19)-C(20)      | 1.368(4)   |
| C(19)-H(19)      | 0.9300     |
| C(20)-C(21)      | 1.402(3)   |
| C(20)-H(20)      | 0.9300     |
| C(21)-H(21)      | 0.9300     |
| O(3)-O(3)#1      | 1.75(3)    |
| O(3)-H(3C)       | 1.086(17)  |
| C(3)-N(3)-H(3A)  | 119.8(15)  |
| C(3)-N(3)-H(3B)  | 115.2(15)  |
| H(3A)-N(3)-H(3B) | 120(2)     |
| O(2)-N(5)-O(1)   | 124.57(16) |
| O(2)-N(5)-C(6)   | 119.57(15) |
| O(1)-N(5)-C(6)   | 115.84(17) |
| C(6)-C(1)-C(10)  | 115.68(14) |
| C(6)-C(1)-C(2)   | 106.89(13) |
| C(10)-C(1)-C(2)  | 109.95(13) |
| C(6)-C(1)-H(1)   | 108.0      |
| C(10)-C(1)-H(1)  | 108.0      |
| C(2)-C(1)-H(1)   | 108.0      |
| C(7)-C(2)-C(8)   | 110.15(14) |
| C(7)-C(2)-C(3)   | 106.65(13) |
| C(8)-C(2)-C(3)   | 108.81(14) |
| C(7)-C(2)-C(1)   | 109.60(13) |
| C(8)-C(2)-C(1)   | 107.78(14) |
| C(3)-C(2)-C(1)   | 113.84(13) |
| C(4)-C(3)-N(3)   | 124.58(17) |
| C(4)-C(3)-C(2)   | 120.06(14) |

---

|                   |            |
|-------------------|------------|
| N(3)-C(3)-C(2)    | 115.08(16) |
| C(3)-C(4)-C(9)    | 117.98(15) |
| C(3)-C(4)-C(5)    | 126.84(15) |
| C(9)-C(4)-C(5)    | 115.16(15) |
| C(4)-C(5)-C(16)   | 110.34(14) |
| C(4)-C(5)-C(6)    | 110.09(13) |
| C(16)-C(5)-C(6)   | 116.63(14) |
| C(4)-C(5)-H(5)    | 106.4      |
| C(16)-C(5)-H(5)   | 106.4      |
| C(6)-C(5)-H(5)    | 106.4      |
| N(5)-C(6)-C(1)    | 111.10(14) |
| N(5)-C(6)-C(5)    | 107.34(13) |
| C(1)-C(6)-C(5)    | 115.13(13) |
| N(5)-C(6)-H(6)    | 107.7      |
| C(1)-C(6)-H(6)    | 107.7      |
| C(5)-C(6)-H(6)    | 107.7      |
| N(1)-C(7)-C(2)    | 174.4(2)   |
| N(2)-C(8)-C(2)    | 176.7(2)   |
| N(4)-C(9)-C(4)    | 179.9(3)   |
| C(11)-C(10)-C(15) | 118.51(17) |
| C(11)-C(10)-C(1)  | 118.83(16) |
| C(15)-C(10)-C(1)  | 122.65(17) |
| C(10)-C(11)-C(12) | 121.1(2)   |
| C(10)-C(11)-H(11) | 119.5      |
| C(12)-C(11)-H(11) | 119.5      |
| C(13)-C(12)-C(11) | 120.0(2)   |
| C(13)-C(12)-H(12) | 120.0      |
| C(11)-C(12)-H(12) | 120.0      |
| C(14)-C(13)-C(12) | 119.6(2)   |
| C(14)-C(13)-H(13) | 120.2      |
| C(12)-C(13)-H(13) | 120.2      |
| C(13)-C(14)-C(15) | 120.9(2)   |
| C(13)-C(14)-H(14) | 119.5      |
| C(15)-C(14)-H(14) | 119.5      |
| C(10)-C(15)-C(14) | 119.8(2)   |
| C(10)-C(15)-H(15) | 120.1      |
| C(14)-C(15)-H(15) | 120.1      |
| C(17)-C(16)-C(21) | 118.13(19) |
| C(17)-C(16)-C(5)  | 122.96(16) |
| C(21)-C(16)-C(5)  | 118.80(18) |
| C(18)-C(17)-C(16) | 120.9(2)   |
| C(18)-C(17)-H(17) | 119.6      |
| C(16)-C(17)-H(17) | 119.6      |
| C(19)-C(18)-C(17) | 121.5(3)   |
| C(19)-C(18)-H(18) | 119.2      |
| C(17)-C(18)-H(18) | 119.2      |
| C(18)-C(19)-C(20) | 119.1(2)   |
| C(18)-C(19)-H(19) | 120.5      |
| C(20)-C(19)-H(19) | 120.5      |
| C(19)-C(20)-C(21) | 120.5(2)   |
| C(19)-C(20)-H(20) | 119.8      |
| C(21)-C(20)-H(20) | 119.8      |
| C(16)-C(21)-C(20) | 119.9(2)   |
| C(16)-C(21)-H(21) | 120.0      |
| C(20)-C(21)-H(21) | 120.0      |
| O(3)#1-O(3)-H(3C) | 115.1(19)  |

---

Symmetry transformations used to generate equivalent atoms:  
#1 -x+2,-y+2,-z+2



Table 4. Anisotropic displacement parameters ( $\text{\AA}^2 \times 10^3$ ) for cd28234.  
 The anisotropic displacement factor exponent takes the form:  
 $-2 \pi^2 [ h^2 a^{*2} U_{11} + \dots + 2 h k a^* b^* U_{12} ]$

|       | U11   | U22   | U33    | U23    | U13    | U12   |
|-------|-------|-------|--------|--------|--------|-------|
| N(1)  | 66(1) | 55(1) | 49(1)  | 10(1)  | 9(1)   | 32(1) |
| N(2)  | 51(1) | 71(1) | 53(1)  | -9(1)  | -14(1) | 17(1) |
| N(3)  | 32(1) | 45(1) | 85(1)  | -9(1)  | -1(1)  | 18(1) |
| N(4)  | 66(1) | 57(1) | 53(1)  | -7(1)  | 1(1)   | 39(1) |
| N(5)  | 34(1) | 38(1) | 60(1)  | 6(1)   | -3(1)  | 17(1) |
| O(1)  | 40(1) | 63(1) | 76(1)  | -1(1)  | -23(1) | 17(1) |
| O(2)  | 43(1) | 67(1) | 69(1)  | 1(1)   | 12(1)  | 22(1) |
| C(1)  | 32(1) | 35(1) | 36(1)  | 3(1)   | 2(1)   | 16(1) |
| C(2)  | 30(1) | 33(1) | 35(1)  | -1(1)  | -2(1)  | 14(1) |
| C(3)  | 31(1) | 37(1) | 38(1)  | 4(1)   | 1(1)   | 18(1) |
| C(4)  | 35(1) | 36(1) | 35(1)  | 0(1)   | 3(1)   | 19(1) |
| C(5)  | 35(1) | 37(1) | 36(1)  | -6(1)  | -5(1)  | 16(1) |
| C(6)  | 28(1) | 38(1) | 39(1)  | 2(1)   | -2(1)  | 15(1) |
| C(7)  | 36(1) | 36(1) | 40(1)  | -2(1)  | 1(1)   | 17(1) |
| C(8)  | 32(1) | 41(1) | 41(1)  | 1(1)   | 0(1)   | 14(1) |
| C(9)  | 41(1) | 41(1) | 38(1)  | 0(1)   | 2(1)   | 20(1) |
| C(10) | 30(1) | 35(1) | 48(1)  | -2(1)  | 2(1)   | 16(1) |
| C(11) | 59(1) | 53(1) | 49(1)  | -4(1)  | 1(1)   | 33(1) |
| C(12) | 73(2) | 62(1) | 71(2)  | -16(1) | 6(1)   | 38(1) |
| C(13) | 60(1) | 51(1) | 94(2)  | -2(1)  | 16(1)  | 35(1) |
| C(14) | 55(1) | 56(1) | 84(2)  | 17(1)  | 11(1)  | 37(1) |
| C(15) | 45(1) | 49(1) | 55(1)  | 3(1)   | 3(1)   | 28(1) |
| C(16) | 30(1) | 32(1) | 61(1)  | -4(1)  | 1(1)   | 17(1) |
| C(17) | 59(1) | 42(1) | 61(1)  | 8(1)   | 2(1)   | 21(1) |
| C(18) | 68(2) | 60(2) | 84(2)  | 26(1)  | 15(1)  | 32(1) |
| C(19) | 51(2) | 55(2) | 133(3) | 36(2)  | 27(2)  | 29(1) |
| C(20) | 41(1) | 32(1) | 153(3) | -10(2) | 4(2)   | 10(1) |
| C(21) | 41(1) | 45(1) | 88(2)  | -16(1) | -1(1)  | 18(1) |

Table 5. Hydrogen coordinates ( $\times 10^4$ ) and isotropic displacement parameters ( $\text{\AA}^2 \times 10^3$ ) for cd28234.

|       | x        | y        | z        | U(eq) |
|-------|----------|----------|----------|-------|
| H(1)  | 899      | 3796     | -499     | 41    |
| H(5)  | 1283     | 4787     | 1215     | 44    |
| H(6)  | 1134     | 3785     | 1060     | 43    |
| H(11) | 752      | 2918     | -1281    | 63    |
| H(12) | 878      | 2015     | -1538    | 80    |
| H(13) | 1149     | 1520     | -588     | 78    |
| H(14) | 1297     | 1930     | 612      | 73    |
| H(15) | 1145     | 2819     | 889      | 57    |
| H(17) | 1205     | 4805     | -815     | 67    |
| H(18) | 1816     | 5728     | -1535    | 85    |
| H(19) | 2513     | 6730     | -999     | 94    |
| H(20) | 2597     | 6816     | 292      | 95    |
| H(21) | 2012     | 5876     | 1041     | 71    |
| H(3A) | -999(9)  | 3324(9)  | 211(11)  | 54(7) |
| H(3B) | -817(11) | 3946(10) | 589(13)  | 73(8) |
| H(3C) | 9649(11) | 9530(11) | 9249(14) | 93(8) |

Table 6. Torsion angles [deg] for cd28234.

|                         |             |
|-------------------------|-------------|
| C(6)-C(1)-C(2)-C(7)     | -71.35(17)  |
| C(10)-C(1)-C(2)-C(7)    | 54.95(18)   |
| C(6)-C(1)-C(2)-C(8)     | 168.77(14)  |
| C(10)-C(1)-C(2)-C(8)    | -64.93(17)  |
| C(6)-C(1)-C(2)-C(3)     | 47.99(18)   |
| C(10)-C(1)-C(2)-C(3)    | 174.29(13)  |
| C(7)-C(2)-C(3)-C(4)     | 100.52(18)  |
| C(8)-C(2)-C(3)-C(4)     | -140.68(16) |
| C(1)-C(2)-C(3)-C(4)     | -20.5(2)    |
| C(7)-C(2)-C(3)-N(3)     | -73.70(19)  |
| C(8)-C(2)-C(3)-N(3)     | 45.1(2)     |
| C(1)-C(2)-C(3)-N(3)     | 165.30(16)  |
| N(3)-C(3)-C(4)-C(9)     | -4.7(3)     |
| C(2)-C(3)-C(4)-C(9)     | -178.37(15) |
| N(3)-C(3)-C(4)-C(5)     | 173.75(18)  |
| C(2)-C(3)-C(4)-C(5)     | 0.1(3)      |
| C(3)-C(4)-C(5)-C(16)    | 120.80(19)  |
| C(9)-C(4)-C(5)-C(16)    | -60.68(19)  |
| C(3)-C(4)-C(5)-C(6)     | -9.3(2)     |
| C(9)-C(4)-C(5)-C(6)     | 169.18(15)  |
| O(2)-N(5)-C(6)-C(1)     | 16.6(2)     |
| O(1)-N(5)-C(6)-C(1)     | -165.06(14) |
| O(2)-N(5)-C(6)-C(5)     | -110.09(17) |
| O(1)-N(5)-C(6)-C(5)     | 68.26(18)   |
| C(10)-C(1)-C(6)-N(5)    | 54.97(19)   |
| C(2)-C(1)-C(6)-N(5)     | 177.77(13)  |
| C(10)-C(1)-C(6)-C(5)    | 177.25(14)  |
| C(2)-C(1)-C(6)-C(5)     | -59.95(18)  |
| C(4)-C(5)-C(6)-N(5)     | 165.20(14)  |
| C(16)-C(5)-C(6)-N(5)    | 38.51(19)   |
| C(4)-C(5)-C(6)-C(1)     | 40.9(2)     |
| C(16)-C(5)-C(6)-C(1)    | -85.76(18)  |
| C(8)-C(2)-C(7)-N(1)     | -173.7(19)  |
| C(3)-C(2)-C(7)-N(1)     | -56(2)      |
| C(1)-C(2)-C(7)-N(1)     | 68(2)       |
| C(7)-C(2)-C(8)-N(2)     | 150(4)      |
| C(3)-C(2)-C(8)-N(2)     | 33(4)       |
| C(1)-C(2)-C(8)-N(2)     | -91(4)      |
| C(3)-C(4)-C(9)-N(4)     | -134(100)   |
| C(5)-C(4)-C(9)-N(4)     | 47(98)      |
| C(6)-C(1)-C(10)-C(11)   | -146.71(17) |
| C(2)-C(1)-C(10)-C(11)   | 92.12(19)   |
| C(6)-C(1)-C(10)-C(15)   | 34.4(2)     |
| C(2)-C(1)-C(10)-C(15)   | -86.8(2)    |
| C(15)-C(10)-C(11)-C(12) | 0.9(3)      |
| C(1)-C(10)-C(11)-C(12)  | -178.06(18) |
| C(10)-C(11)-C(12)-C(13) | -0.8(3)     |
| C(11)-C(12)-C(13)-C(14) | -0.1(3)     |
| C(12)-C(13)-C(14)-C(15) | 1.0(3)      |
| C(11)-C(10)-C(15)-C(14) | 0.0(3)      |
| C(1)-C(10)-C(15)-C(14)  | 178.89(16)  |
| C(13)-C(14)-C(15)-C(10) | -0.9(3)     |
| C(4)-C(5)-C(16)-C(17)   | -65.3(2)    |
| C(6)-C(5)-C(16)-C(17)   | 61.2(2)     |
| C(4)-C(5)-C(16)-C(21)   | 110.64(18)  |
| C(6)-C(5)-C(16)-C(21)   | -122.80(18) |
| C(21)-C(16)-C(17)-C(18) | 2.2(3)      |
| C(5)-C(16)-C(17)-C(18)  | 178.19(18)  |
| C(16)-C(17)-C(18)-C(19) | -1.6(3)     |
| C(17)-C(18)-C(19)-C(20) | -0.3(4)     |
| C(18)-C(19)-C(20)-C(21) | 1.7(4)      |
| C(17)-C(16)-C(21)-C(20) | -0.9(3)     |
| C(5)-C(16)-C(21)-C(20)  | -177.02(17) |
| C(19)-C(20)-C(21)-C(16) | -1.1(3)     |

Symmetry transformations used to generate equivalent atoms:  
 #1 -x+2,-y+2,-z+2

Table 7. Hydrogen bonds for cd28234 [Å and deg.].

| D-H...A             | d(D-H)    | d(H...A)  | d(D...A) | <(DHA)    |
|---------------------|-----------|-----------|----------|-----------|
| N(3)-H(3A)...O(2)#2 | 0.814(15) | 2.632(17) | 3.346(2) | 147.3(19) |

Symmetry transformations used to generate equivalent atoms:

#1 -x+2,-y+2,-z+2    #2 x-y,x,-z

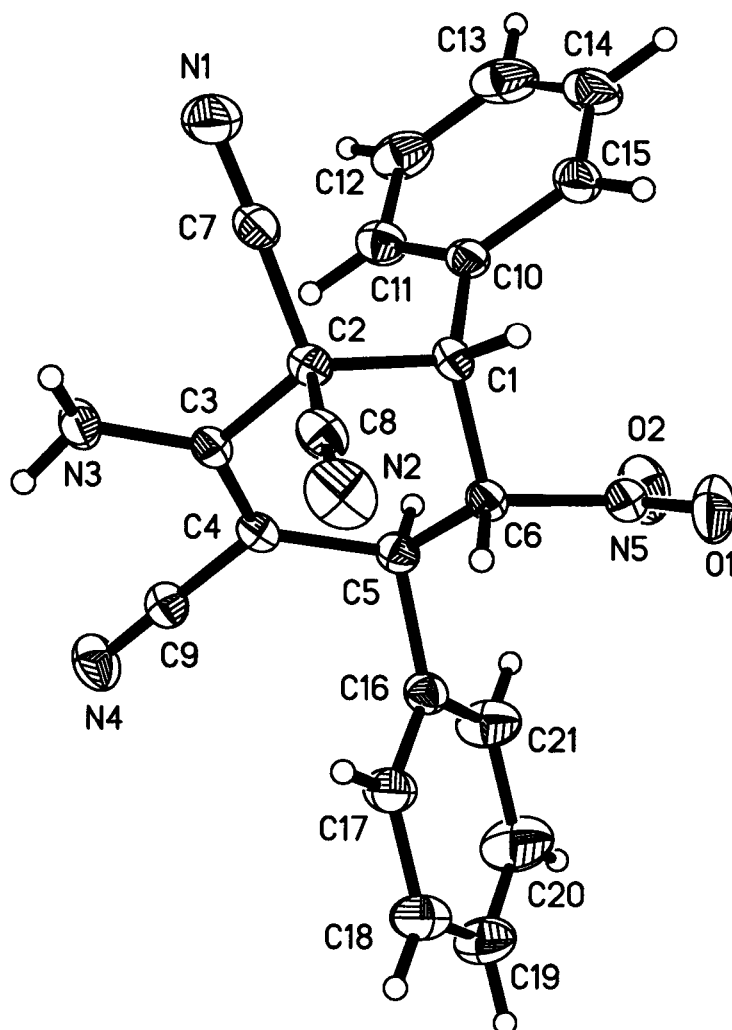

The crystal data of compound **4a-2** have been deposited in CCDC with number 688759. Empirical Formula:  $C_{21}H_{15}N_5O_2$ ; Formula Weight: 369.38; Crystal size: 0.321 x 0.236 x 0.051; Crystal Color, Habit: colorless, prismatic; Crystal System: Monoclinic; Lattice Type: Primitive; Lattice Parameters:  $a = 13.2254(13)\text{\AA}$ ,  $b = 11.3377(12)\text{\AA}$ ,  $c = 14.1441(15)\text{\AA}$ ,  $\alpha = 90^\circ$ ,  $\beta = 117.874(2)^\circ$ ,  $\gamma = 90^\circ$ ,  $V = 1874.8(3)\text{\AA}^3$ ; Space group:  $P2(1)/c$ ;  $Z = 4$ ;  $D_{calc} = 1.309\text{ g/cm}^3$ ;  $F_{000} = 768$ ;  $R1 = 0.0561$ ,  $wR2 = 0.1011$ . Diffractometer: Rigaku AFC7R.

Table 1. Crystal data and structure refinement for cd28232.

|                                   |                                                                                                                             |
|-----------------------------------|-----------------------------------------------------------------------------------------------------------------------------|
| Identification code               | cd28232                                                                                                                     |
| Empirical formula                 | C21 H15 N5 O2                                                                                                               |
| Formula weight                    | 369.38                                                                                                                      |
| Temperature                       | 293(2) K                                                                                                                    |
| Wavelength                        | 0.71073 Å                                                                                                                   |
| Crystal system, space group       | Monoclinic, P2(1)/n                                                                                                         |
| Unit cell dimensions              | a = 13.2254(13) Å    alpha = 90 deg.<br>b = 11.3377(12) Å    beta = 117.874(2) deg.<br>c = 14.1441(15) Å    gamma = 90 deg. |
| Volume                            | 1874.8(3) Å <sup>3</sup>                                                                                                    |
| Z, Calculated density             | 4, 1.309 Mg/m <sup>3</sup>                                                                                                  |
| Absorption coefficient            | 0.088 mm <sup>-1</sup>                                                                                                      |
| F(000)                            | 768                                                                                                                         |
| Crystal size                      | 0.321 x 0.236 x 0.051 mm                                                                                                    |
| Theta range for data collection   | 1.74 to 26.99 deg.                                                                                                          |
| Limiting indices                  | -16<=h<=13, -10<=k<=14, -18<=l<=18                                                                                          |
| Reflections collected / unique    | 10802 / 4078 [R(int) = 0.0527]                                                                                              |
| Completeness to theta = 26.99     | 99.8 %                                                                                                                      |
| Absorption correction             | Empirical                                                                                                                   |
| Max. and min. transmission        | 1.00000 and 0.86356                                                                                                         |
| Refinement method                 | Full-matrix least-squares on F <sup>2</sup>                                                                                 |
| Data / restraints / parameters    | 4078 / 0 / 261                                                                                                              |
| Goodness-of-fit on F <sup>2</sup> | 0.993                                                                                                                       |
| Final R indices [I>2sigma(I)]     | R1 = 0.0561, wR2 = 0.1011                                                                                                   |
| R indices (all data)              | R1 = 0.0884, wR2 = 0.1131                                                                                                   |
| Largest diff. peak and hole       | 0.169 and -0.162 e.Å <sup>-3</sup>                                                                                          |

Table 2. Atomic coordinates ( $\times 10^4$ ) and equivalent isotropic displacement parameters ( $\text{\AA}^2 \times 10^3$ ) for cd28232. U(eq) is defined as one third of the trace of the orthogonalized  $U_{ij}$  tensor.

|       | x       | y       | z        | U(eq) |
|-------|---------|---------|----------|-------|
| N(1)  | 2283(2) | 4290(2) | 3016(2)  | 56(1) |
| N(2)  | 4589(2) | 1524(2) | 3299(2)  | 64(1) |
| N(3)  | 1286(2) | 1756(2) | 1555(2)  | 42(1) |
| N(4)  | 316(2)  | 408(2)  | -962(1)  | 53(1) |
| N(5)  | 4464(2) | 3434(2) | 237(2)   | 44(1) |
| O(1)  | 5484(1) | 3456(2) | 830(1)   | 70(1) |
| O(2)  | 3994(2) | 3896(2) | -635(1)  | 69(1) |
| C(1)  | 3562(2) | 3655(2) | 1403(1)  | 32(1) |
| C(2)  | 2982(2) | 2918(2) | 1952(1)  | 32(1) |
| C(3)  | 1999(1) | 2131(2) | 1176(1)  | 30(1) |
| C(4)  | 1910(2) | 1844(2) | 215(1)   | 31(1) |
| C(5)  | 2662(2) | 2304(2) | -254(1)  | 32(1) |
| C(6)  | 3749(2) | 2804(2) | 652(1)   | 33(1) |
| C(7)  | 2587(2) | 3709(2) | 2546(2)  | 37(1) |
| C(8)  | 3871(2) | 2120(2) | 2737(2)  | 39(1) |
| C(9)  | 1023(2) | 1049(2) | -441(2)  | 36(1) |
| C(10) | 2965(2) | 4800(2) | 903(2)   | 35(1) |
| C(11) | 1797(2) | 4896(2) | 246(2)   | 45(1) |
| C(12) | 1316(2) | 5976(2) | -181(2)  | 58(1) |
| C(13) | 1989(3) | 6968(2) | 47(2)    | 67(1) |
| C(14) | 3143(3) | 6879(2) | 693(2)   | 62(1) |
| C(15) | 3635(2) | 5807(2) | 1115(2)  | 47(1) |
| C(16) | 2948(2) | 1340(2) | -844(2)  | 36(1) |
| C(17) | 3322(2) | 251(2)  | -390(2)  | 48(1) |
| C(18) | 3615(2) | -603(2) | -915(2)  | 62(1) |
| C(19) | 3536(2) | -376(2) | -1893(2) | 67(1) |
| C(20) | 3159(2) | 696(3)  | -2355(2) | 78(1) |
| C(21) | 2859(2) | 1553(2) | -1841(2) | 60(1) |

Table 3. Bond lengths [Å] and angles [deg] for cd28232.

|                  |            |
|------------------|------------|
| N(1)-C(7)        | 1.135(2)   |
| N(2)-C(8)        | 1.133(2)   |
| N(3)-C(3)        | 1.353(2)   |
| N(3)-H(3A)       | 0.88(2)    |
| N(3)-H(3B)       | 0.88(2)    |
| N(4)-C(9)        | 1.141(2)   |
| N(5)-O(2)        | 1.210(2)   |
| N(5)-O(1)        | 1.211(2)   |
| N(5)-C(6)        | 1.505(2)   |
| C(1)-C(10)       | 1.512(2)   |
| C(1)-C(6)        | 1.538(2)   |
| C(1)-C(2)        | 1.565(2)   |
| C(1)-H(1)        | 0.9800     |
| C(2)-C(7)        | 1.481(3)   |
| C(2)-C(8)        | 1.487(3)   |
| C(2)-C(3)        | 1.535(2)   |
| C(3)-C(4)        | 1.349(2)   |
| C(4)-C(9)        | 1.425(3)   |
| C(4)-C(5)        | 1.522(2)   |
| C(5)-C(6)        | 1.518(2)   |
| C(5)-C(16)       | 1.526(2)   |
| C(5)-H(5)        | 0.9800     |
| C(6)-H(6)        | 0.9800     |
| C(10)-C(11)      | 1.385(3)   |
| C(10)-C(15)      | 1.389(2)   |
| C(11)-C(12)      | 1.382(3)   |
| C(11)-H(11)      | 0.9300     |
| C(12)-C(13)      | 1.375(3)   |
| C(12)-H(12)      | 0.9300     |
| C(13)-C(14)      | 1.368(3)   |
| C(13)-H(13)      | 0.9300     |
| C(14)-C(15)      | 1.376(3)   |
| C(14)-H(14)      | 0.9300     |
| C(15)-H(15)      | 0.9300     |
| C(16)-C(17)      | 1.372(3)   |
| C(16)-C(21)      | 1.381(3)   |
| C(17)-C(18)      | 1.382(3)   |
| C(17)-H(17)      | 0.9300     |
| C(18)-C(19)      | 1.362(3)   |
| C(18)-H(18)      | 0.9300     |
| C(19)-C(20)      | 1.359(3)   |
| C(19)-H(19)      | 0.9300     |
| C(20)-C(21)      | 1.378(3)   |
| C(20)-H(20)      | 0.9300     |
| C(21)-H(21)      | 0.9300     |
| C(3)-N(3)-H(3A)  | 117.6(12)  |
| C(3)-N(3)-H(3B)  | 121.4(14)  |
| H(3A)-N(3)-H(3B) | 115.2(19)  |
| O(2)-N(5)-O(1)   | 124.88(18) |
| O(2)-N(5)-C(6)   | 119.02(17) |
| O(1)-N(5)-C(6)   | 116.08(18) |
| C(10)-C(1)-C(6)  | 115.65(15) |
| C(10)-C(1)-C(2)  | 114.87(14) |
| C(6)-C(1)-C(2)   | 106.37(14) |
| C(10)-C(1)-H(1)  | 106.4      |
| C(6)-C(1)-H(1)   | 106.4      |
| C(2)-C(1)-H(1)   | 106.4      |
| C(7)-C(2)-C(8)   | 108.09(15) |
| C(7)-C(2)-C(3)   | 110.62(14) |
| C(8)-C(2)-C(3)   | 106.84(15) |
| C(7)-C(2)-C(1)   | 110.03(15) |
| C(8)-C(2)-C(1)   | 107.18(14) |
| C(3)-C(2)-C(1)   | 113.80(14) |
| C(4)-C(3)-N(3)   | 125.13(17) |
| C(4)-C(3)-C(2)   | 120.42(15) |
| N(3)-C(3)-C(2)   | 114.44(16) |
| C(3)-C(4)-C(9)   | 117.76(16) |



---

|                   |            |
|-------------------|------------|
| C(3)-C(4)-C(5)    | 126.14(16) |
| C(9)-C(4)-C(5)    | 116.09(15) |
| C(6)-C(5)-C(4)    | 108.30(14) |
| C(6)-C(5)-C(16)   | 110.51(14) |
| C(4)-C(5)-C(16)   | 111.84(15) |
| C(6)-C(5)-H(5)    | 108.7      |
| C(4)-C(5)-H(5)    | 108.7      |
| C(16)-C(5)-H(5)   | 108.7      |
| N(5)-C(6)-C(5)    | 111.59(15) |
| N(5)-C(6)-C(1)    | 107.71(14) |
| C(5)-C(6)-C(1)    | 115.01(14) |
| N(5)-C(6)-H(6)    | 107.4      |
| C(5)-C(6)-H(6)    | 107.4      |
| C(1)-C(6)-H(6)    | 107.4      |
| N(1)-C(7)-C(2)    | 178.2(2)   |
| N(2)-C(8)-C(2)    | 175.4(2)   |
| N(4)-C(9)-C(4)    | 179.7(3)   |
| C(11)-C(10)-C(15) | 118.58(19) |
| C(11)-C(10)-C(1)  | 123.79(17) |
| C(15)-C(10)-C(1)  | 117.63(18) |
| C(12)-C(11)-C(10) | 120.3(2)   |
| C(12)-C(11)-H(11) | 119.9      |
| C(10)-C(11)-H(11) | 119.9      |
| C(13)-C(12)-C(11) | 120.5(2)   |
| C(13)-C(12)-H(12) | 119.8      |
| C(11)-C(12)-H(12) | 119.8      |
| C(14)-C(13)-C(12) | 119.6(2)   |
| C(14)-C(13)-H(13) | 120.2      |
| C(12)-C(13)-H(13) | 120.2      |
| C(13)-C(14)-C(15) | 120.5(2)   |
| C(13)-C(14)-H(14) | 119.7      |
| C(15)-C(14)-H(14) | 119.7      |
| C(14)-C(15)-C(10) | 120.6(2)   |
| C(14)-C(15)-H(15) | 119.7      |
| C(10)-C(15)-H(15) | 119.7      |
| C(17)-C(16)-C(21) | 118.38(19) |
| C(17)-C(16)-C(5)  | 121.01(17) |
| C(21)-C(16)-C(5)  | 120.59(18) |
| C(16)-C(17)-C(18) | 120.6(2)   |
| C(16)-C(17)-H(17) | 119.7      |
| C(18)-C(17)-H(17) | 119.7      |
| C(19)-C(18)-C(17) | 120.3(2)   |
| C(19)-C(18)-H(18) | 119.8      |
| C(17)-C(18)-H(18) | 119.8      |
| C(20)-C(19)-C(18) | 119.7(2)   |
| C(20)-C(19)-H(19) | 120.2      |
| C(18)-C(19)-H(19) | 120.2      |
| C(19)-C(20)-C(21) | 120.5(2)   |
| C(19)-C(20)-H(20) | 119.7      |
| C(21)-C(20)-H(20) | 119.7      |
| C(20)-C(21)-C(16) | 120.5(2)   |
| C(20)-C(21)-H(21) | 119.8      |
| C(16)-C(21)-H(21) | 119.8      |

---

Symmetry transformations used to generate equivalent atoms:

Table 4. Anisotropic displacement parameters ( $\text{\AA}^2 \times 10^3$ ) for cd28232.  
 The anisotropic displacement factor exponent takes the form:  
 $-2 \pi^2 [ h^2 a^{*2} U_{11} + \dots + 2 h k a^* b^* U_{12} ]$

|       | U11    | U22   | U33    | U23    | U13   | U12    |
|-------|--------|-------|--------|--------|-------|--------|
| N(1)  | 79(1)  | 45(1) | 59(1)  | -7(1)  | 43(1) | -4(1)  |
| N(2)  | 59(1)  | 60(1) | 52(1)  | 12(1)  | 9(1)  | 5(1)   |
| N(3)  | 49(1)  | 42(1) | 41(1)  | -8(1)  | 26(1) | -17(1) |
| N(4)  | 52(1)  | 55(1) | 47(1)  | -10(1) | 19(1) | -20(1) |
| N(5)  | 50(1)  | 34(1) | 59(1)  | -8(1)  | 36(1) | -8(1)  |
| O(1)  | 41(1)  | 74(1) | 101(1) | -1(1)  | 37(1) | -12(1) |
| O(2)  | 82(1)  | 73(1) | 60(1)  | 13(1)  | 41(1) | -18(1) |
| C(1)  | 31(1)  | 30(1) | 33(1)  | -3(1)  | 13(1) | -7(1)  |
| C(2)  | 36(1)  | 28(1) | 30(1)  | -1(1)  | 15(1) | -2(1)  |
| C(3)  | 31(1)  | 25(1) | 32(1)  | 2(1)   | 14(1) | -2(1)  |
| C(4)  | 32(1)  | 26(1) | 31(1)  | -1(1)  | 11(1) | -2(1)  |
| C(5)  | 37(1)  | 29(1) | 30(1)  | 2(1)   | 15(1) | 0(1)   |
| C(6)  | 36(1)  | 27(1) | 36(1)  | 1(1)   | 18(1) | -2(1)  |
| C(7)  | 45(1)  | 31(1) | 35(1)  | -3(1)  | 20(1) | -8(1)  |
| C(8)  | 43(1)  | 36(1) | 32(1)  | 0(1)   | 12(1) | -6(1)  |
| C(9)  | 38(1)  | 37(1) | 31(1)  | 1(1)   | 15(1) | -3(1)  |
| C(10) | 50(1)  | 28(1) | 34(1)  | -3(1)  | 27(1) | -4(1)  |
| C(11) | 52(1)  | 36(1) | 46(1)  | 1(1)   | 23(1) | 3(1)   |
| C(12) | 73(2)  | 53(2) | 54(2)  | 11(1)  | 34(1) | 23(1)  |
| C(13) | 116(2) | 37(1) | 68(2)  | 15(1)  | 60(2) | 22(2)  |
| C(14) | 106(2) | 32(1) | 72(2)  | -2(1)  | 61(2) | -9(1)  |
| C(15) | 67(2)  | 37(1) | 51(1)  | -6(1)  | 40(1) | -11(1) |
| C(16) | 41(1)  | 34(1) | 34(1)  | -5(1)  | 18(1) | -4(1)  |
| C(17) | 64(1)  | 37(1) | 51(1)  | -1(1)  | 34(1) | 2(1)   |
| C(18) | 76(2)  | 43(1) | 76(2)  | -7(1)  | 43(2) | 6(1)   |
| C(19) | 78(2)  | 61(2) | 73(2)  | -24(2) | 44(2) | 0(2)   |
| C(20) | 110(2) | 86(2) | 49(2)  | -10(2) | 47(2) | 13(2)  |
| C(21) | 88(2)  | 56(2) | 41(1)  | 5(1)   | 35(1) | 15(1)  |

Table 5. Hydrogen coordinates ( $\times 10^4$ ) and isotropic displacement parameters ( $\text{\AA}^2 \times 10^3$ ) for cd28232.

|       | x        | y        | z        | U(eq) |
|-------|----------|----------|----------|-------|
| H(1)  | 4324     | 3869     | 1968     | 38    |
| H(5)  | 2255     | 2940     | -758     | 39    |
| H(6)  | 4200     | 2138     | 1085     | 39    |
| H(11) | 1335     | 4231     | 91       | 54    |
| H(12) | 532      | 6033     | -625     | 70    |
| H(13) | 1661     | 7694     | -236     | 80    |
| H(14) | 3599     | 7549     | 848      | 75    |
| H(15) | 4422     | 5756     | 1545     | 56    |
| H(17) | 3378     | 87       | 277      | 57    |
| H(18) | 3868     | -1338    | -599     | 74    |
| H(19) | 3740     | -950     | -2242    | 81    |
| H(20) | 3102     | 851      | -3024    | 93    |
| H(21) | 2596     | 2281     | -2168    | 72    |
| H(3A) | 835(16)  | 1160(18) | 1231(16) | 44(6) |
| H(3B) | 1458(17) | 1846(19) | 2230(18) | 59(7) |

Table 6. Torsion angles [deg] for cd28232.

|                         |             |
|-------------------------|-------------|
| C(10)-C(1)-C(2)-C(7)    | -40.9(2)    |
| C(6)-C(1)-C(2)-C(7)     | -170.18(14) |
| C(10)-C(1)-C(2)-C(8)    | -158.18(15) |
| C(6)-C(1)-C(2)-C(8)     | 72.51(17)   |
| C(10)-C(1)-C(2)-C(3)    | 83.92(19)   |
| C(6)-C(1)-C(2)-C(3)     | -45.39(19)  |
| C(7)-C(2)-C(3)-C(4)     | 143.89(17)  |
| C(8)-C(2)-C(3)-C(4)     | -98.68(19)  |
| C(1)-C(2)-C(3)-C(4)     | 19.4(2)     |
| C(7)-C(2)-C(3)-N(3)     | -37.5(2)    |
| C(8)-C(2)-C(3)-N(3)     | 79.96(19)   |
| C(1)-C(2)-C(3)-N(3)     | -161.95(16) |
| N(3)-C(3)-C(4)-C(9)     | -2.5(3)     |
| C(2)-C(3)-C(4)-C(9)     | 175.99(16)  |
| N(3)-C(3)-C(4)-C(5)     | 176.55(17)  |
| C(2)-C(3)-C(4)-C(5)     | -5.0(3)     |
| C(3)-C(4)-C(5)-C(6)     | 18.4(2)     |
| C(9)-C(4)-C(5)-C(6)     | -162.53(16) |
| C(3)-C(4)-C(5)-C(16)    | 140.43(18)  |
| C(9)-C(4)-C(5)-C(16)    | -40.5(2)    |
| O(2)-N(5)-C(6)-C(5)     | 29.3(2)     |
| O(1)-N(5)-C(6)-C(5)     | -152.22(17) |
| O(2)-N(5)-C(6)-C(1)     | -97.8(2)    |
| O(1)-N(5)-C(6)-C(1)     | 80.6(2)     |
| C(4)-C(5)-C(6)-N(5)     | -171.84(14) |
| C(16)-C(5)-C(6)-N(5)    | 65.33(19)   |
| C(4)-C(5)-C(6)-C(1)     | -48.8(2)    |
| C(16)-C(5)-C(6)-C(1)    | -171.61(15) |
| C(10)-C(1)-C(6)-N(5)    | 59.6(2)     |
| C(2)-C(1)-C(6)-N(5)     | -171.57(15) |
| C(10)-C(1)-C(6)-C(5)    | -65.5(2)    |
| C(2)-C(1)-C(6)-C(5)     | 63.32(19)   |
| C(8)-C(2)-C(7)-N(1)     | -46(7)      |
| C(3)-C(2)-C(7)-N(1)     | 70(7)       |
| C(1)-C(2)-C(7)-N(1)     | -163(7)     |
| C(7)-C(2)-C(8)-N(2)     | -137(3)     |
| C(3)-C(2)-C(8)-N(2)     | 104(3)      |
| C(1)-C(2)-C(8)-N(2)     | -18(3)      |
| C(3)-C(4)-C(9)-N(4)     | -70(40)     |
| C(5)-C(4)-C(9)-N(4)     | 111(40)     |
| C(6)-C(1)-C(10)-C(11)   | 77.2(2)     |
| C(2)-C(1)-C(10)-C(11)   | -47.4(2)    |
| C(6)-C(1)-C(10)-C(15)   | -102.46(19) |
| C(2)-C(1)-C(10)-C(15)   | 132.98(17)  |
| C(15)-C(10)-C(11)-C(12) | -0.4(3)     |
| C(1)-C(10)-C(11)-C(12)  | -179.99(18) |
| C(10)-C(11)-C(12)-C(13) | -0.4(3)     |
| C(11)-C(12)-C(13)-C(14) | 0.6(4)      |
| C(12)-C(13)-C(14)-C(15) | 0.0(3)      |
| C(13)-C(14)-C(15)-C(10) | -0.8(3)     |
| C(11)-C(10)-C(15)-C(14) | 1.0(3)      |
| C(1)-C(10)-C(15)-C(14)  | -179.37(18) |
| C(6)-C(5)-C(16)-C(17)   | 73.3(2)     |
| C(4)-C(5)-C(16)-C(17)   | -47.5(2)    |
| C(6)-C(5)-C(16)-C(21)   | -105.3(2)   |
| C(4)-C(5)-C(16)-C(21)   | 133.99(19)  |
| C(21)-C(16)-C(17)-C(18) | 0.8(3)      |
| C(5)-C(16)-C(17)-C(18)  | -177.79(18) |
| C(16)-C(17)-C(18)-C(19) | 0.0(3)      |
| C(17)-C(18)-C(19)-C(20) | -0.5(4)     |
| C(18)-C(19)-C(20)-C(21) | 0.2(4)      |
| C(19)-C(20)-C(21)-C(16) | 0.5(4)      |
| C(17)-C(16)-C(21)-C(20) | -1.0(3)     |
| C(5)-C(16)-C(21)-C(20)  | 177.5(2)    |

Symmetry transformations used to generate equivalent atoms:

Table 7. Hydrogen bonds for cd28232 [Å and deg.].

| D-H...A             | d(D-H)  | d(H...A) | d(D...A) | <(DHA)    |
|---------------------|---------|----------|----------|-----------|
| N(3)-H(3A)...N(4)#1 | 0.88(2) | 2.26(2)  | 3.091(3) | 159.6(17) |

Symmetry transformations used to generate equivalent atoms:

#1 -x,-y,-z
